# Supplementary material
Source: PubMed Central journal article supplement (PMC4265817)

## Chemistry Materials and Methods

Starting materials and reagents were purchased from commercial suppliers and used without further purification. Thin-layer chromatography (TLC) was performed on silica gel 60 F254 (Merck), and column chromatography was carried out on pre-loaded BiotageR SNAP columns with BiotageR KP-Sil. Evaporation was done *in vacuo* on a Buchi rotary evaporator. Celite 545R was used during palladium filtrations. Reaction temperatures refer to the temperature of the cooling/heating bath unless otherwise stated. Proton nuclear magnetic resonance (<sup>1</sup>H NMR) spectra were recorded on a Varian Mercury Vx-400 equipped with a 4 nucleus auto switchable probe and z-gradient or a Bruker Avance-400 equipped with a QNP (Quad Nucleus Probe) or a BBI (Broad Band Inverse) and z-gradient. Chemical shifts are given in parts per million (ppm) with the residual solvent signal used as reference. NMR abbreviations are used as follows: s = singlet, d = doublet, dd = doublet of doublet, ddd = doublet of doublet of doublets, dt = doublet of triplet, t = triplet, tt = triplet of triplets, q = quartet, m = multiplet, bs = broad singlet.

Analytical HPLC/MS was conducted on a PE Sciex API 150EX mass spectrometer with an electrospray source, using a Shimadzu Inc. LC-10A VP UV detector monitoring at 214 nm, Analyst 1.2 software, and either (a) a Gilson 215 autosampler and an Alltech Prevail™ C18 column (5 μm, 250 mm × 4.6 mm), using a gradient of 5% v/v CH<sub>3</sub>CN (containing 1% v/v TFA) in H<sub>2</sub>O (containing 1% v/v TFA) (*t* = 0.0 min) to 95% v/v CH<sub>3</sub>CN in H<sub>2</sub>O (*t* = 6.0 min), 3.5 mL/min or (b) a PE 200 autosampler and a Supelco DiscoveryR C18 column (5 μm, 50 mm × 2.1 mm), using a gradient of 5% v/v CH<sub>3</sub>CN (containing 1% v/v TFA) in H<sub>2</sub>O (containing 1% v/v TFA) (*t* = 0.0 min) to 95% v/v CH<sub>3</sub>CN in H<sub>2</sub>O (*t* = 5.0 min), 0.75 mL/min.

High resolution mass spectra (HRMS) samples were analyzed in the negative ion mode using a QTOF Micro (Waters) time-of-flight mass spectrometer. The mass spectrometric detection was achieved using negative electrospray ionization. The source conditions were as follows: 3000 V capillary voltage, 9 V sample cone voltage, 2 V extraction cone voltage, 300 °C desolvation temperature, 120 °C source temperature, and 6 V collision energy (26 V collision energy for the MS<sup>2</sup> analysis).

### Preparation of (*R*)-2-(7-(4-Cyclopentyl-3-(trifluoromethyl)benzyloxy)-1,2,3,4-tetrahydrocyclopenta[*b*]indol-3-yl)acetic acid (APD334, **4**):

Step A. Preparation of Ethyl 2-(7-Hydroxy-1,2,3,4-tetrahydrocyclopenta[*b*]indol-3-yl)acetate. 2-Iodo-4-methoxyaniline (2.0 g, 8.03 mmol) and ethyl 2-(2-oxocyclopentyl)acetate (2.05 g, 12.1 mmol) were dissolved in *N,N*-dimethylformamide (30 mL) and tetraethyl orthosilicate (2.12 g, 10.4 mmol) and pyridinium *p*-toluenesulfonate (0.081 g, 0.321 mmol) were added. The reaction mixture was heated and stirred at 135 °C

for 4 h. After cooling to 120 °C, diisopropylethylamine (3.11 g, 24.09 mmol) and palladium (II) acetate (0.054 g, 0.241 mmol) were added. The reaction mixture was stirred for 3 h and then partitioned between ethyl acetate and water. The aqueous layer was extracted with ethyl acetate. The combined organic extracts were dried over anhydrous sodium sulfate, filtered and concentrated under reduced pressure. The resultant solution was diluted with 50% ethyl acetate in hexanes and filtered through a pad of silica gel. The filtrate was concentrated and purified by silica gel column chromatography to give 1.9 g of ethyl 2-(7-methoxy-1,2,3,4-tetrahydrocyclopenta[b]indol-3-yl)acetate containing residual ethyl 2-(2-oxocyclopentyl)acetate. The mixture was dissolved in dichloromethane (80 mL) and cooled to 0 °C. Boron tribromide (1.0 M solution in dichloromethane, 21.0 mL, 21.0 mmol) was added and the reaction was stirred for 1.5 h. Ice water was added and the reaction mixture was allowed to reach room temperature. The aqueous mixture was extracted with dichloromethane. The combined organics were dried over sodium sulfate, filtered and concentrated under reduced pressure. The residue was purified by silica gel column chromatography to give the title compound (650 mg). LCMS  $m/z = 260.3$  [M+H]<sup>+</sup>; <sup>1</sup>H NMR (400 MHz, CDCl<sub>3</sub>) δ ppm 1.29 (t,  $J = 7.2$  Hz, 3H), 2.05-2.14 (m, 1H), 2.50 (dd,  $J = 16.8, 11.2$  Hz, 1H), 2.68-2.86 (m, 4H), 3.48-3.58 (m, 1H), 4.16-4.24 (m, 2H), 6.66 (dd,  $J = 8.6, 2.4$  Hz, 1H), 6.85 (d,  $J = 2.4$  Hz, 1H), 7.15 (d,  $J = 8.7$  Hz, 1H), 8.4 (s, 1H).

Step B. Preparation of Methyl 4-Chloro-3-(trifluoromethyl)benzoate: To a solution of 4-chloro-3-(trifluoromethyl)benzoic acid (10.4 g, 46.2 mmol) in methanol (100 mL) was added concentrated sulfuric acid (0.51 mL, 9.24 mmol). The mixture was heated under reflux overnight. The mixture was allowed to cool to room temperature and concentrated under reduced pressure to form a solid. The solid was filtered and washed with water. The solid was then stirred with saturated aqueous sodium bicarbonate solution to remove any residual sulfuric acid, filtered and dried under vacuum to give the title compound as a white solid (10.18 g, 92% yield). <sup>1</sup>H NMR (400 MHz, CDCl<sub>3</sub>) δ ppm 3.96 (s, 3H), 7.60 (d,  $J = 8.3$  Hz, 1H), 8.14 (dd,  $J = 8.3, 2.0$  Hz, 1H), 8.37 (d,  $J = 2.0$  Hz, 1H).

Step C. Preparation of Methyl 4-Cyclopentyl-3-(trifluoromethyl)benzoate: To zinc(II) chloride (0.5 M solution in tetrahydrofuran, 88.0 mL, 44.0 mmol) was added cyclopentylmagnesium chloride (2 M solution in ether, 20.5 mL, 41.0 mmol). The resulting suspension was stirred at room temperature for 1 h. To the above suspension was added methyl 4-chloro-3-(trifluoromethyl)benzoate (7.00 g, 29.3 mmol) and *bis*(tri-*tert*-butylphosphine)palladium (1.35 g, 2.64 mmol) at room temperature. The mixture was heated under reflux for 2 h. The mixture was allowed to cool to room temperature, quenched with saturated aqueous sodium bicarbonate solution and filtered. The filtrate was extracted with ethyl acetate. The organic layer was dried over anhydrous sodium sulfate, concentrated under reduced pressure and purified by silica gel column

chromatography to give the title compound as colorless oil (7.64 g, 96% yield). LCMS  $m/z = 273.2$   $[M+H]^+$ ;  $^1H$  NMR (400 MHz,  $CDCl_3$ )  $\delta$  ppm 1.57-1.66 (m, 2H), 1.68-1.82 (m, 2H), 1.82-1.94 (m, 2H), 2.04-2.21 (m, 2H), 3.33-3.49 (m, 1H), 3.93 (s, 3H), 7.54 (d,  $J = 8.2$  Hz, 1H), 8.13 (dd,  $J = 8.3, 1.8$  Hz, 1H), 8.27 (s, 1H).

Step D. Preparation of (4-Cyclopentyl-3-(trifluoromethyl)phenyl)methanol: To a solution of methyl 4-cyclopentyl-3-(trifluoromethyl)benzoate (8.16 g, 30.0 mmol) in 1,4-dioxane (200 mL) was added lithium borohydride (2.0 M solution in tetrahydrofuran, 30.0 mL, 6.0 mmol). The mixture was heated under reflux for 2.5 h. The mixture was allowed to cool to room temperature and carefully quenched with 1 N aqueous hydrochloric acid solution to pH 5. The organic layer was separated and the aqueous layer was extracted with ethyl acetate. The combined organic layers were dried over anhydrous sodium sulfate, concentrated under reduced pressure and purified by silica gel column chromatography to give the title compound as a colorless oil (5.46 g, 75% yield).  $^1H$  NMR (400 MHz,  $CDCl_3$ )  $\delta$  ppm 1.56-1.63 (m, 2H), 1.66-1.77 (m, 2H), 1.81-1.91 (m, 2H), 2.03-2.15 (m, 2H), 3.37 (quintet,  $J = 8.0$  Hz, 1H), 4.71 (d,  $J = 4.3$  Hz, 2H), 7.45-7.47 (m, 1H), 7.49 (d,  $J = 1.1$  Hz, 1H), 7.60 (s, 1H).

Step E. Preparation of 4-(Chloromethyl)-1-cyclopentyl-2-(trifluoromethyl)benzene: To (4-cyclopentyl-3-(trifluoromethyl)phenyl)methanol (1.21 g, 4.95 mmol) was added thionyl chloride (5.5 mL, 74.2 mmol). The mixture was heated at 50 °C for 2 h before it was allowed to cool to room temperature and stir overnight. The mixture was poured into ice and stirred for 5 minutes before it was extracted with dichloromethane. The organic extract was washed with saturated aqueous sodium bicarbonate solution, dried over anhydrous sodium sulfate and concentrated under reduced pressure to give the title compound as a light yellow oil (1.16 g, 89% yield).  $^1H$  NMR (400 MHz,  $CDCl_3$ )  $\delta$  ppm 1.55-1.63 (m, 2H), 1.69-1.77 (m, 2H), 1.82-1.90 (m, 2H), 2.05-2.13 (m, 2H), 3.37 (quintet,  $J = 8.6$  Hz, 1H), 4.58 (s, 2H), 7.46 (d,  $J = 8.0$  Hz, 1H), 7.52 (d,  $J = 8.0$  Hz, 1H), 7.61 (d,  $J = 1.5$  Hz, 1H).

Step F. Preparation of Ethyl 2-(7-(4-Cyclopentyl-3-(trifluoromethyl)benzyloxy)-1,2,3,4-tetrahydrocyclopenta[*b*]indol-3-yl)acetate : To a solution of ethyl 2-(7-hydroxy-1,2,3,4-tetrahydrocyclopenta[*b*]indol-3-yl)acetate (50.0 mg, 0.193 mmol) and 4-(chloromethyl)-1-cyclopentyl-2-(trifluoromethyl)benzene (152.0 mg, 0.578 mmol) in *N,N*-dimethylformamide (3 mL) was added cesium carbonate (75.0 mg, 0.231 mmol). The mixture was stirred at room temperature overnight, filtered through Celite<sup>®</sup>, and concentrated under reduced pressure. The residue was purified by HPLC to give the title compound as a light pink oil (38.7 mg, 41% yield). LCMS  $m/z = 486.5$   $[M+H]^+$ .

Step G. Preparation of 2-(7-(4-Cyclopentyl-3-(trifluoromethyl)benzyloxy)-1,2,3,4-tetrahydrocyclopenta[b]indol-3-yl)acetic Acid (Compound 15): To a solution of ethyl 2-(7-(4-cyclopentyl-3-(trifluoromethyl)benzyloxy)-1,2,3,4-tetrahydrocyclopenta[b]indol-3-yl)acetate (38.7 mg, 0.080 mmol) in a mixed solvent of methanol (1.5 mL), tetrahydrofuran (0.5 mL), and water (0.5 mL) was added lithium hydroxide hydrate (11.7 mg, 0.279 mmol). The mixture was stirred at room temperature overnight and then acidified to pH 4 with 1 N aqueous hydrochloric acid and extracted with ethyl acetate. The organic layer was dried over anhydrous sodium sulfate and concentrated under reduced pressure. The foam was triturated with water to give a solid. The solid was filtered to give the title compound as a light pink solid (25.7 mg, 70% yield). LCMS  $m/z = 458.4$  [M+H]<sup>+</sup>; <sup>1</sup>H NMR (400 MHz, DMSO-*d*<sub>6</sub>) δ ppm 1.56-1.70 (m, 4H), 1.80-1.87 (m, 2H), 1.95-2.11 (m, 3H), 2.34 (dd, *J* = 16.0, 9.0 Hz, 1H), 2.59-2.74 (m, 4H), 3.21-3.25 (m, 1H), 3.41-3.49 (m, 1H), 5.11 (s, 2H), 6.70 (dd, *J* = 8.7, 2.4 Hz, 1H), 6.92 (d, *J* = 2.3 Hz, 1H), 7.19 (d, *J* = 8.7 Hz, 1H), 7.61 (d, *J* = 8.0 Hz, 1H), 7.68 (d, *J* = 8.0 Hz, 1H), 7.70 (s, 1H), 10.45 (s, 1H), 12.18 (bs, 1H).

Step H. (*R*)-2-(7-(4-Cyclopentyl-3-(trifluoromethyl)benzyloxy)-1,2,3,4-tetrahydrocyclopenta[b]indol-3-yl)acetic acid (APD334, Compound 4): Racemic 2-(7-(4-Cyclopentyl-3-(trifluoromethyl)benzyloxy)-1,2,3,4-tetrahydrocyclopenta[b]indol-3-yl)acetic acid was resolved by normal phase preparative chiral chromatography using a ChiralCel OD column (50 X 500mm ID, 20 μm particle size) and a 8/92 solution of isopropanol (0.05% trifluoroacetic acid) and hexanes (0.05% trifluoroacetic acid) as eluent. The method was isocratic with a flow rate of 60 ml/minute and the detector was set to 220nm. APD334 is the second eluting enantiomer (most retained) with a retention time of 48.4 minutes. <sup>1</sup>H NMR (400 MHz, DMSO-*d*<sub>6</sub>) δ ppm 1.54-1.75 (m, 4H), 1.79-1.92 (m, 2H), 1.95-2.16 (m, 3H), 2.39 (dd, *J* = 16.0, 8.8 Hz, 1H), 2.61-2.83 (m, 4H), 3.23-3.34 (m, 1H), 3.45-3.56 (m, 1H), 5.14 (s, 2H), 6.74 (dd, *J* = 8.7, 2.4 Hz, 1H), 6.92 (d, *J* = 2.3 Hz, 1H), 7.24 (d, *J* = 8.8 Hz, 1H), 7.64 (d, *J* = 8.1 Hz, 1H), 7.72 (d, *J* = 8.6 Hz, 1H), 7.74 (s, 1H), 10.50 (s, 1H), 12.24 (bs, 1H). <sup>13</sup>C APT NMR (100 MHz, DMSO-*d*<sub>6</sub>): δ up (C, CH<sub>2</sub>): 23.1, 25.5, 35.5, 35.6, 68.6, 117.0, 124.7 (q, *J* = 273 Hz), 124.2, 126.8 (q, *J* = 28 Hz), 128.7, 136.1, 136.2, 144.6, 147.0, 151.9, 173.4; down (CH, CH<sub>3</sub>): 35.0, 40.5, 102.1, 110.0, 112.4, 124.1 (q, *J* = 5.7 Hz), 128.4, 131.7. <sup>19</sup>F NMR (400 MHz, DMSO-*d*<sub>6</sub>) δ ppm -57.4. LCMS (ESI<sup>+</sup>): calcd for C<sub>26</sub>H<sub>27</sub>F<sub>3</sub>NO<sub>3</sub><sup>+</sup> [M+H] 458.19; found, 458.4. HRMS (ESI<sup>-</sup>): calcd for C<sub>26</sub>H<sub>25</sub>F<sub>3</sub>NO<sub>3</sub><sup>-</sup> [M-H] 456.1792; found, 456.1776.

Preparation of 7, 2-(7-(3-Cyano-5-(trifluoromethoxy)benzyloxy)-1,2,3,4-tetrahydrocyclopenta[b]indol-3-yl) acetic acid: Ethyl 2-(7-hydroxy-1,2,3,4-tetrahydrocyclopenta[b]indol-3-yl)acetate (100 mg, 0.386 mmol) and 3-(hydroxymethyl)-5-(trifluoromethoxy)benzotrile (84 mg, 0.386 mmol) were dissolved in tetrahydrofuran (3.0 mL) and cooled to 0 °C. Triphenylphosphine (202 mg, 0.771 mmol) and

diisopropylazodicarboxylate (DIAD) (0.15 mL, 0.771 mmol) were added. The mixture was warmed to room temperature and stirred for 1 h. Additional DIAD (0.15 mL, 0.771 mmol) and triphenylphosphine (202 mg, 0.771 mmol) were added and the reaction mixture was stirred for 1 h. The reaction mixture was diluted with water and extracted with ethyl acetate. The combined organics were dried over anhydrous sodium sulfate, filtered and concentrated under reduced pressure. The residue was purified by silica gel column chromatography to give 50.8 mg of impure ethyl 2-(7-(3-cyano-5-(trifluoromethoxy)benzyloxy)-1,2,3,4-tetrahydrocyclopenta[b]indol-3-yl)acetate. The material was dissolved in dioxane (1.3 mL) and 1.0 M aqueous lithium hydroxide (0.33 mL, 0.33 mmol) was added. The reaction was monitored by LCMS until judged complete and then acidified to pH 2 with 1.0 M hydrochloric acid. The aqueous mixture was extracted with ethyl acetate. The combined organics were dried over anhydrous sodium sulfate, filtered and concentrated under reduced pressure. The residue was purified by silica gel column chromatography followed by HPLC to give the title compound (1.1 mg). LCMS  $m/z = 431.2$   $[M+H]^+$ ;  $^1H$  NMR (400 MHz,  $CD_3OD$ )  $\delta$  ppm 2.11-2.20 (m, 1H), 2.50 (dd,  $J = 15.8, 8.0$  Hz, 1H), 2.66-2.84 (m, 4H), 3.51-3.60 (m, 1H), 5.18 (s, 2H), 6.78 (dd,  $J = 8.8, 2.5$  Hz, 1H), 6.95 (d,  $J = 2.4$  Hz, 1H), 7.20 (d,  $J = 8.9$  Hz, 1H), 7.64 (s, 1H), 7.73 (s, 1H), 7.84 (s, 1H).

Preparation of 8, 2-(7-(3,5-Bis(trifluoromethyl)benzyloxy)-1,2,3,4-tetrahydrocyclopenta[b]indol-3-yl)acetic Acid:

Step A. Preparation of Ethyl 2-(7-(3,5-Bis(trifluoromethyl)benzyloxy)-1,2,3,4-tetrahydrocyclopenta[b]indol-3-yl)acetate: Ethyl 2-(7-hydroxy-1,2,3,4-tetrahydrocyclopenta[b]indol-3-yl)acetate (61 mg, 0.235 mmol) was dissolved in *N,N*-dimethylformamide (1.0 mL) and cesium carbonate (77 mg, 0.235 mmol) and 1-(bromomethyl)-3,5-bis(trifluoromethyl)benzene (72 mg, 0.235 mmol) were added. The reaction mixture was stirred at room temperature for 16 h and then filtered through a pad of Celite<sup>®</sup>. The filtrate was diluted with water and extracted with ethyl acetate. The combined organics were dried over anhydrous sodium sulfate, filtered and concentrated under reduced pressure. The residue was purified by silica gel column chromatography to give the title compound (28.6 mg). LCMS  $m/z = 486.4$   $[M+H]^+$ .

Step B. Preparation of 2-(7-(3,5-Bis(trifluoromethyl)benzyloxy)-1,2,3,4-tetrahydrocyclopenta[b]indol-3-yl)acetic Acid: Ethyl 2-(7-(3,5-bis(trifluoromethyl)benzyloxy)-1,2,3,4-tetrahydrocyclopenta[b]indol-3-yl)acetate (28.6 mg, 0.059 mmol) was dissolved in dioxane (1.0 mL) and 1.0 M aqueous lithium hydroxide solution (0.166 mL, 0.166 mmol) was added. The solution was stirred at room temperature for 3 h before it

was acidified to pH 3 with 1.0 M hydrochloric acid and extracted with ethyl acetate. The combined extracts were dried over sodium sulfate, filtered and concentrated under reduced pressure to give the title compound (23 mg). LCMS  $m/z = 458.3$   $[M+H]^+$ ;  $^1H$  NMR (400 MHz,  $CDCl_3$ )  $\delta$  ppm 2.12-2.24 (m, 1H), 2.61 (dd,  $J = 17.0, 10.7$  Hz, 1H), 2.73-2.89 (m, 4H), 3.53-3.63 (m, 1H), 5.19 (s, 2H), 6.86 (dd,  $J = 8.6, 2.5$  Hz, 1H), 7.0 (d,  $J = 2.5$  Hz, 1H), 7.24 (d,  $J = 8.8$  Hz, 1H), 7.82 (s, 1H), 7.94 (s, 2H), 8.33 (s, 1H).

Preparation of **9**, 2-(7-(3-Cyano-4-(trifluoromethoxy)benzyloxy)-1,2,3,4-tetrahydrocyclopenta[*b*]indol-3-yl)acetic Acid:

Ethyl 2-(7-hydroxy-1,2,3,4-tetrahydrocyclopenta[*b*]indol-3-yl)acetate (0.100 g, 0.386 mmol) and cesium carbonate (0.138 g, 0.424 mmol) were dissolved in *N,N*-dimethylformamide (1.0 mL), stirred at room temperature for 10 min, followed by addition of 5-(chloromethyl)-2-(trifluoromethoxy)benzonitrile (0.100 g, 0.424 mmol) in *N,N*-dimethylformamide (0.300 mL) at 0 °C. This mixture was stirred at room temperature for 3 h. The reaction mixture was quenched with water and extracted with ethyl acetate. The organic phase was washed with brine and concentrated. The residue was taken up in dioxane (4 mL) before aqueous 1 N lithium hydroxide (1.3 mL) was added. The mixture was stirred at room temperature for 2.5 h before it was quenched with water and acidified to pH 3 using aqueous 3 N hydrochloric acid. The mixture was purified by HPLC to give the title compound (0.040 g). LCMS  $m/z = 431.2$   $[M+H]^+$ ,  $^1H$  NMR (500 MHz,  $DMSO-d_6$ )  $\delta$  ppm 2.00-2.20 (m, 1H), 2.01-2.21 (m, 1H), 2.23-2.43 (m, 1H), 2.55-2.83 (m, 4H), 3.33-3.57 (m, 1H), 5.16 (s, 2H), 6.73 (dd,  $J = 8.8, 2.5$  Hz, 1H), 6.94 (s, 1H), 7.21 (d,  $J = 8.8$  Hz, 1H), 7.69 (dd,  $J = 8.7, 1.4$  Hz, 1H), 7.94 (dd,  $J = 8.7, 2.1$  Hz, 1H), 8.09 (s, 1H), 10.40 (s, 1H).

Preparation of **16**, 2-(7-(4-Cyclobutyl-3-(trifluoromethyl)benzyloxy)-1,2,3,4-tetrahydrocyclopenta[*b*]indol-3-yl)acetic Acid.

To a solution of ethyl 2-(7-(4-chloro-3-(trifluoromethyl)benzyloxy)-1,2,3,4-tetrahydrocyclopenta[*b*]indol-3-yl)acetate (202.8 mg, 0.449 mmol) in tetrahydrofuran (1 mL) was added 0.5 M cyclobutylzinc(II) bromide solution in tetrahydrofuran (8.98 mL, 4.49 mmol) and *bis*(tri-*t*-butylphosphine)palladium (46.8 mg, 0.090 mmol) at room temperature. The mixture was heated at 90 °C for 63 h. The mixture was then quenched with 1 N aqueous hydrochloric acid solution and filtered through celite®. The filtrate was extracted with ethyl acetate. The organic layer was washed with brine solution to remove excess

hydrochloric acid and concentrated under reduced pressure. The residue was purified by HPLC to afford the title compound as a pink solid (32.3 mg). LCMS  $m/z = 444.6$   $[M+H]^+$ ;  $^1H$  NMR (400 MHz, DMSO- $d_6$ )  $\delta$  ppm 1.78-1.87 (m, 1H), 1.93-2.02 (m, 1H), 2.03-2.12 (m, 1H), 2.16-2.28 (m, 4H), 2.34 (dd,  $J = 16.0, 9.0$  Hz, 1H), 2.60-2.75 (m, 4H), 3.41-3.51 (m, 1H), 3.74-3.84 (m, 1H), 5.12 (s, 2H), 6.70 (dd,  $J = 8.8, 2.5$  Hz, 1H), 6.92 (d,  $J = 2.4$  Hz, 1H), 7.19 (d,  $J = 8.8$  Hz, 1H), 7.66-7.78 (m, 3H), 10.46 (s, 1H), 12.20 (bs, 1H).

*The following compounds were prepared by the methods described above:*

**10**, 2-(7-((3-cyano-4-methoxybenzyl)oxy)-1,2,3,4-tetrahydrocyclopenta[*b*]indol-3-yl)acetic acid: LCMS  $m/z = 377.4$   $[M+H]^+$ .  $^1H$  NMR (400 MHz, DMSO- $d_6$ )  $\delta$  ppm 2.04-2.13 (m, 1H), 2.35 (dd,  $J = 16.4, 9.0$  Hz, 1H), 2.58-2.77 (m, 4H), 3.41-3.50 (m, 1H), 3.92 (s, 3H), 5.02 (s, 2H), 6.69 (dd,  $J = 8.9, 2.6$  Hz, 1H), 6.91 (d,  $J = 2.3$  Hz, 1H), 7.19 (d,  $J = 8.7$  Hz, 1H), 7.26 (d,  $J = 8.8$  Hz, 1H), 7.75 (dd,  $J = 8.8, 2.0$  Hz, 1H), 10.5 (s, 1H), 12.2 (bs, 1H).

**11**, 2-(7-(4-Cyano-3-(trifluoromethyl)benzyloxy)-1,2,3,4-tetrahydrocyclopenta[*b*]indol-3-yl)acetic acid: LCMS  $m/z = 415.4$   $[M+H]^+$ .  $^1H$  NMR (400 MHz, DMSO- $d_6$ )  $\delta$  ppm 2.01-2.14 (m, 1H), 2.35 (dd,  $J = 16.0, 9.0$  Hz, 1H), 2.57-2.78 (m, 4H), 3.38-3.53 (m, 1H), 5.29 (s, 2H), 6.75 (dd,  $J = 8.8, 2.5$  Hz, 1H), 6.94 (d,  $J = 2.5$  Hz, 1H), 7.22 (d,  $J = 8.7$  Hz, 1H), 7.97 (s, 1H), 8.07 (s, 1H), 8.19 (d,  $J = 8.0$  Hz, 1H), 10.50 (s, 1H), 12.18 (bs, 1H)

**12**, 2-(7-(4-Chloro-3-(trifluoromethyl)benzyloxy)-1,2,3,4-tetrahydrocyclopenta[*b*]indol-3-yl)acetic Acid: LCMS  $m/z = 424.2$   $[M+H]^+$ ;  $^1H$  NMR (400 MHz, CDCl<sub>3</sub>)  $\delta$  ppm 2.09-2.19 (m, 1H), 2.61 (dd,  $J = 17.3, 11.0$  Hz, 1H), 2.72-2.89 (m, 4H), 3.53-3.63 (m, 1H), 5.10 (s, 2H), 6.83 (dd,  $J = 8.7, 2.4$  Hz, 1H), 6.97 (d,  $J = 2.4$  Hz, 1H), 7.22 (d,  $J = 8.6$  Hz, 1H), 7.50 (d,  $J = 8.2$  Hz, 1H), 7.57 (dd,  $J = 8.2, 1.6$  Hz, 1H), 7.80 (d,  $J = 1.8$  Hz, 1H), 8.33 (bs, 1H).

**13**, 2-(7-(3-Cyano-4-cyclohexylbenzyloxy)-1,2,3,4-tetrahydrocyclopenta[*b*]indol-3-yl)acetic Acid: LCMS  $m/z = 429.6$   $[M+H]^+$ ;  $^1H$  NMR (400 MHz, DMSO- $d_6$ )  $\delta$  ppm 1.21-1.31 (m, 1H), 1.33-1.54 (m, 4H), 1.68-1.74 (m, 1H), 1.74-1.88 (m, 4H), 2.08 (dd,  $J = 4.9, 3.5$  Hz, 1H), 2.34 (dd,  $J = 16.0, 9.0$  Hz, 1H), 2.61-2.76 (m, 4H), 2.81-2.89 (m, 1H), 3.45 (bs, 1H), 5.07 (s, 2H), 6.70 (dd,  $J = 8.8, 2.5$  Hz, 1H), 6.91 (d,  $J = 2.4$  Hz, 1H), 7.19 (d,  $J = 8.7$  Hz, 1H), 7.52 (d,  $J = 8.1$  Hz, 1H), 7.72 (dd,  $J = 8.2, 1.7$  Hz, 1H), 7.81 (d,  $J = 1.5$  Hz, 1H), 10.46 (s, 1H), 12.18 (bs, 1H).

**14**, 2-(7-(4-cyclohexyl-3-(trifluoromethyl)benzyloxy)-1,2,3,4-tetrahydrocyclopenta[*b*]indol-3-yl)acetic acid: LCMS  $m/z = 472.2$   $(M+H^+)$ ;  $^1H$  NMR (400 MHz, CDCl<sub>3</sub>)  $\delta$  ppm 1.38-1.50 (m, 4H), 1.76-1.85 (m, 6H), 2.11-2.17 (m, 1H), 2.58-2.65 (m, 1H), 2.75-2.93 (m, 5H), 3.56-3.60 (m, 1H), 5.07 (s, 2H), 6.84 (dd,  $J = 8.8,$

2.5 Hz, 1H), 7.00 (d,  $J = 2.4$  Hz, 1H), 7.21 (d,  $J = 8.8$  Hz, 1H), 7.46 (d,  $J = 8.1$  Hz, 1H), 7.59 (d,  $J = 8.1$  Hz, 1H), 7.70 (d,  $J = 1.2$  Hz, 1H), 8.27 (s, 1H).

**17, 2-(7-(4-Cyclopropyl-3-(trifluoromethyl)benzyloxy)-1,2,3,4-tetrahydrocyclopenta[*b*]indol-3-yl)acetic**

**Acid:** LCMS  $m/z = 430.5$  [M+H]<sup>+</sup>; <sup>1</sup>H NMR (400 MHz, DMSO- $d_6$ )  $\delta$  ppm 0.74-0.88 (m, 2H), 0.98-1.07 (m, 2H), 2.02-2.12 (m, 2H), 2.34 (dd,  $J = 16.0, 9.0$  Hz, 1H), 2.59-2.76 (m, 4H), 3.39-3.52 (m, 1H), 5.10 (s, 2H), 6.69 (dd,  $J = 8.7, 2.5$  Hz, 1H), 6.91 (d,  $J = 2.4$  Hz, 1H), 7.10-7.26 (m, 2H), 7.61 (d,  $J = 8.3$  Hz, 1H), 7.72 (d,  $J = 1.1$  Hz, 1H), 10.45 (s, 1H), 12.20 (bs, 1H).

**18, 2-(7-(4-Propyl-3-(trifluoromethyl)benzyloxy)-1,2,3,4-tetrahydrocyclopenta[*b*]indol-3-yl)acetic Acid:**

LCMS  $m/z = 432.5$  [M+H]<sup>+</sup>; <sup>1</sup>H NMR (400 MHz, CD<sub>3</sub>CN)  $\delta$  ppm 0.98 (t,  $J = 7.3$  Hz, 3H), 1.57-1.71 (m, 2H), 2.04-2.18 (m, 1H), 2.60 (d,  $J = 7.5$  Hz, 2H), 2.66-2.83 (m, 5H), 3.46-3.57 (m, 1H), 5.10 (s, 2H), 6.76 (dd,  $J = 8.8, 2.5$  Hz, 1H), 6.96 (d,  $J = 2.4$  Hz, 1H), 7.23 (d,  $J = 8.8$  Hz, 1H), 7.44 (d,  $J = 7.80$  Hz, 1H), 7.62 (d,  $J = 8.0$  Hz, 1H), 7.73 (s, 1H), 8.86 (bs, 1H).

**19, 2-(7-(4-Neopentyl-3-(trifluoromethyl)benzyloxy)-1,2,3,4-tetrahydrocyclopenta[*b*]indol-3-yl)acetic Acid:**

LCMS  $m/z = 460.6$  [M+H]<sup>+</sup>; <sup>1</sup>H NMR (400 MHz, CDCl<sub>3</sub>)  $\delta$  ppm 0.96 (s, 9H), 2.08-2.19 (m, 1H), 2.61 (dd,  $J = 17.0, 10.9$  Hz, 1H), 2.73-2.90 (m, 6H), 3.54-3.63 (m, 1H), 5.09 (s, 2H), 6.85 (dd,  $J = 8.8, 2.5$  Hz, 1H), 7.0 (d,  $J = 2.5$  Hz, 1H), 7.22 (d,  $J = 9.0$  Hz, 1H), 7.36 (d,  $J = 8.0$  Hz, 1H), 7.55 (d,  $J = 8.1$  Hz, 1H), 7.74 (d,  $J = 1.1$  Hz, 1H), 8.29 (bs, 1H).

**20, 2-(7-(4-Isobutyl-3-(trifluoromethyl)benzyloxy)-1,2,3,4-tetrahydrocyclopenta[*b*]indol-3-yl)acetic Acid:**

LCMS  $m/z = 446.7$  [M+H]<sup>+</sup>; <sup>1</sup>H NMR (400 MHz, DMSO- $d_6$ )  $\delta$  ppm 0.89 (d,  $J = 6.6$  Hz, 6H), 1.87-1.98 (m, 1H), 2.03-2.13 (m, 1H), 2.35 (dd,  $J = 15.9, 9.0$  Hz, 1H), 2.60-2.76 (m, 6H), 3.42-3.50 (m, 1H), 5.12 (s, 2H), 6.71 (dd,  $J = 8.6, 2.4$  Hz, 1H), 6.93 (d,  $J = 2.4$  Hz, 1H), 7.20 (d,  $J = 8.7$  Hz, 1H), 7.47 (d,  $J = 8.0$  Hz, 1H), 7.67 (d,  $J = 8.2$  Hz, 1H), 7.75 (d,  $J = 1.4$  Hz, 1H), 10.47 (bs, 1H).

**21, 2-(7-(4-(Cyclohexylmethyl)-3-(trifluoromethyl)benzyloxy)-1,2,3,4-tetrahydrocyclopenta[*b*]indol-3-**

**yl)acetic acid:** LCMS  $m/z = 486.3$  [M+H]<sup>+</sup>. <sup>1</sup>H NMR (400 MHz, DMSO- $d_6$ )  $\delta$  0.96-1.06 (m, 2H), 1.14-1.22 (m, 3H), 1.55-1.70 (m, 6H), 2.05-2.10 (m, 1H), 2.40 (dd,  $J = 16.0$  and  $9.0$  Hz, 1H), 2.62-2.75 (m, 6H), 3.42-3.50 (m, 1H), 5.12 (s, 2H), 6.72 (dd,  $J = 8.7, 2.4$  Hz, 1H), 6.94 (d,  $J = 2.4$  Hz, 1H), 7.21 (d,  $J = 8.8$  Hz, 1H), 7.45 (d,  $J = 8.0$  Hz, 1H), 7.66 (d,  $J = 7.8$  Hz, 1H), 7.75 (s, 1H), 10.48 (s, 1H), 12.20 (bs, 1H).



## Crystallographic Tables (APD334, 4)

**Table 1. Sample and crystal data**

---

|                        |                           |                            |
|------------------------|---------------------------|----------------------------|
| Empirical formula      | $C_{26}H_{26}F_3NO_3$     |                            |
| Formula weight         | 457.48                    |                            |
| Temperature            | 100(2) K                  |                            |
| Wavelength             | 1.54178 Å                 |                            |
| Crystal size           | 0.500 x 0.300 x 0.200 mm  |                            |
| Crystal habit          | Colourless Prism          |                            |
| Crystal system         | Triclinic                 |                            |
| Space group            | <i>P</i> 1                |                            |
| Unit cell dimensions   | $a = 10.3114(3)$ Å        | $\alpha = 71.923(3)^\circ$ |
|                        | $b = 10.7766(3)$ Å        | $\beta = 75.453(3)^\circ$  |
|                        | $c = 10.9873(3)$ Å        | $\gamma = 77.431(3)^\circ$ |
| Volume                 | 1110.44(6) Å <sup>3</sup> |                            |
| Z                      | 2                         |                            |
| Density (calculated)   | 1.368 Mg/m <sup>3</sup>   |                            |
| Absorption coefficient | 0.889 mm <sup>-1</sup>    |                            |
| F(000)                 | 480                       |                            |

---

**Table 2. Data collection and structure refinement**

---

|                                     |                                                                  |
|-------------------------------------|------------------------------------------------------------------|
| Diffractometer                      | SuperNova, Dual, Cu at zero, Atlas                               |
| Radiation source                    | SuperNova (Cu) X-ray Source, CuK $\alpha$                        |
| Data collection method              | omega scans                                                      |
| Theta range for data collection     | 8.935 to 74.490°                                                 |
| Index ranges                        | -12 $\leq h \leq$ 12, -13 $\leq k \leq$ 13, -13 $\leq l \leq$ 13 |
| Reflections collected               | 20671                                                            |
| Independent reflections             | 8493 [R(int) = 0.0238]                                           |
| Coverage of independent reflections | 99.5 %                                                           |
| Variation in check reflections      | n/a                                                              |
| Absorption correction               | Semi-empirical from equivalents                                  |
| Max. and min. transmission          | 1.00000 and 0.71217                                              |
| Structure solution technique        | Direct methods                                                   |
| Structure solution program          | SHELXTL (Sheldrick, 2013)                                        |
| Refinement technique                | Full-matrix least-squares on $F^2$                               |
| Refinement program                  | SHELXTL (Sheldrick, 2013)                                        |
| Function minimized                  | $\Sigma w(F_o^2 - F_c^2)^2$                                      |
| Data / restraints / parameters      | 8493 / 3 / 609                                                   |
| Goodness-of-fit on $F^2$            | 1.051                                                            |
| $\Delta/\sigma_{\max}$              | 0.000                                                            |
| Final R indices                     |                                                                  |

|                              |                                                                                          |
|------------------------------|------------------------------------------------------------------------------------------|
| 8223 data; $I > 2\sigma(I)$  | R1 = 0.0466, wR2 = 0.1205                                                                |
| all data                     | R1 = 0.0483, wR2 = 0.1231                                                                |
| Weighting scheme             | $w = 1 / [\sigma^2 (F_o^2) + (0.0613P)^2 + 0.4884P]$<br>where $P = (F_o^2 + 2F_c^2) / 3$ |
| Absolute structure parameter | -0.06(6)                                                                                 |
| Extinction coefficient       | n/a                                                                                      |
| Largest diff. peak and hole  | 0.332 and -0.303 eÅ <sup>-3</sup>                                                        |

---

Refinement summary:

|                               |                                                                                                   |
|-------------------------------|---------------------------------------------------------------------------------------------------|
| Ordered Non-H atoms, XYZ      | Freely refining                                                                                   |
| Ordered Non-H atoms, U        | Anisotropic                                                                                       |
| H atoms (on carbon), XYZ      | Idealized positions riding on attached atoms                                                      |
| H atoms (on carbon), U        | Appropriate multiple of U(eq) for bonded atom                                                     |
| H atoms (on heteroatoms), XYZ | Freely refining                                                                                   |
| H atoms (on heteroatoms), U   | Isotropic refining for H bonded to N<br>Appropriate multiple of (-1.5000) U(eq) for H bonded to O |
| Disordered atoms, OCC         | No disorder                                                                                       |
| Disordered atoms, XYZ         | No disorder                                                                                       |
| Disordered atoms, U           | No disorder                                                                                       |

**Table 3. Atomic coordinates and equivalent isotropic atomic displacement parameters, ( $\text{\AA}^2$ )**

$U(\text{eq})$  is defined as one third of the trace of the orthogonalized  $U_{ij}$  tensor.

|      | x/a       | y/b        | z/c        | $U(\text{eq})$ |
|------|-----------|------------|------------|----------------|
| F1B  | 0.8475(2) | -0.2472(2) | -0.2484(3) | 0.0544(6)      |
| F2B  | 0.7431(3) | -0.4122(2) | -0.1999(2) | 0.0513(6)      |
| F3B  | 0.7131(3) | -0.2500(2) | -0.3686(2) | 0.0560(7)      |
| O1B  | 0.6340(2) | -0.0185(2) | 0.1203(2)  | 0.0337(5)      |
| O2B  | 0.9359(3) | 0.5253(3)  | 0.5376(3)  | 0.0514(7)      |
| O3B  | 0.7658(3) | 0.4067(3)  | 0.6120(3)  | 0.0507(7)      |
| N1B  | 0.7360(3) | 0.2669(3)  | 0.4155(3)  | 0.0386(7)      |
| C1B  | 0.8239(4) | 0.4922(4)  | 0.5272(4)  | 0.0425(9)      |
| C2B  | 0.7789(4) | 0.5672(4)  | 0.4036(4)  | 0.0454(9)      |
| C3B  | 0.6591(4) | 0.5265(4)  | 0.3759(5)  | 0.0503(10)     |
| C4B  | 0.6815(3) | 0.3916(4)  | 0.3522(4)  | 0.0396(8)      |
| C5B  | 0.7181(3) | 0.1811(3)  | 0.3507(3)  | 0.0337(7)      |
| C6B  | 0.7579(4) | 0.0454(4)  | 0.3725(4)  | 0.0397(8)      |
| C7B  | 0.7295(4) | -0.0152(3) | 0.2908(4)  | 0.0364(7)      |
| C8B  | 0.6603(3) | 0.0572(3)  | 0.1895(3)  | 0.0308(7)      |
| C9B  | 0.6211(3) | 0.1925(3)  | 0.1656(3)  | 0.0307(7)      |
| C10B | 0.6513(3) | 0.2559(3)  | 0.2473(4)  | 0.0332(7)      |
| C11B | 0.6311(4) | 0.3905(3)  | 0.2507(4)  | 0.0387(8)      |
| C12B | 0.5678(4) | 0.5258(4)  | 0.1840(5)  | 0.0521(11)     |
| C13B | 0.6193(5) | 0.6140(4)  | 0.2426(7)  | 0.0678(15)     |
| C14B | 0.5599(4) | 0.0476(3)  | 0.0192(3)  | 0.0343(7)      |

|      |            |             |             |            |
|------|------------|-------------|-------------|------------|
| C15B | 0.5326(3)  | -0.0564(3)  | -0.0322(3)  | 0.0319(7)  |
| C16B | 0.6355(4)  | -0.1160(3)  | -0.1147(3)  | 0.0328(7)  |
| C17B | 0.6115(4)  | -0.2138(3)  | -0.1609(3)  | 0.0332(7)  |
| C18B | 0.4829(4)  | -0.2512(4)  | -0.1308(3)  | 0.0379(8)  |
| C19B | 0.3815(4)  | -0.1906(4)  | -0.0464(4)  | 0.0408(8)  |
| C20B | 0.4069(4)  | -0.0961(4)  | 0.0022(3)   | 0.0372(8)  |
| C21B | 0.7276(4)  | -0.2793(4)  | -0.2441(4)  | 0.0409(8)  |
| C22B | 0.4471(5)  | -0.3497(4)  | -0.1850(4)  | 0.0480(10) |
| C23B | 0.4160(7)  | -0.4782(5)  | -0.0865(5)  | 0.0697(16) |
| C25B | 0.2856(10) | -0.4219(10) | -0.2618(9)  | 0.115(3)   |
| C26B | 0.3199(7)  | -0.3027(7)  | -0.2454(7)  | 0.0825(18) |
| C24B | 0.3463(9)  | -0.5366(8)  | -0.1621(8)  | 0.101(3)   |
| F1A  | 1.0223(2)  | 1.0076(2)   | 1.75695(19) | 0.0436(5)  |
| F2A  | 0.9871(2)  | 1.1754(2)   | 1.5952(2)   | 0.0417(5)  |
| F3A  | 0.8919(2)  | 1.0074(2)   | 1.6317(2)   | 0.0465(5)  |
| O1A  | 0.8523(3)  | 0.2716(3)   | 0.8365(3)   | 0.0606(9)  |
| O2A  | 1.0239(4)  | 0.3857(4)   | 0.7486(3)   | 0.0693(11) |
| O3A  | 1.1235(2)  | 0.7991(2)   | 1.2483(2)   | 0.0350(5)  |
| N1A  | 0.9609(5)  | 0.5047(4)   | 1.0008(5)   | 0.0662(13) |
| C1A  | 0.9738(5)  | 0.2960(4)   | 0.8326(4)   | 0.0515(11) |
| C2A  | 1.0455(5)  | 0.2081(4)   | 0.9369(4)   | 0.0566(11) |
| C3A  | 0.9958(4)  | 0.2422(4)   | 1.0679(4)   | 0.0429(8)  |
| C4A  | 1.0106(4)  | 0.3789(4)   | 1.0654(5)   | 0.0467(9)  |
| C5A  | 0.9977(5)  | 0.5917(4)   | 1.0514(5)   | 0.0535(11) |
| C6A  | 0.9671(6)  | 0.7292(5)   | 1.0222(6)   | 0.0754(18) |
| C7A  | 1.0105(5)  | 0.7912(4)   | 1.0939(5)   | 0.0575(12) |
| C8A  | 1.0862(3)  | 0.7200(3)   | 1.1892(3)   | 0.0330(7)  |
| C9A  | 1.1196(3)  | 0.5847(3)   | 1.2171(3)   | 0.0293(7)  |

|      |           |           |           |            |
|------|-----------|-----------|-----------|------------|
| C10A | 1.0726(3) | 0.5177(3) | 1.1491(3) | 0.0321(7)  |
| C11A | 1.0784(3) | 0.3821(3) | 1.1550(3) | 0.0331(7)  |
| C12A | 1.1272(6) | 0.2469(4) | 1.2304(4) | 0.0522(11) |
| C13A | 1.0842(5) | 0.1575(4) | 1.1681(5) | 0.0533(11) |
| C14A | 1.1966(4) | 0.7340(3) | 1.3511(3) | 0.0337(7)  |
| C15A | 1.2163(4) | 0.8386(3) | 1.4064(3) | 0.0329(7)  |
| C16A | 1.1107(3) | 0.8905(3) | 1.4914(3) | 0.0304(7)  |
| C17A | 1.1284(3) | 0.9865(3) | 1.5442(3) | 0.0302(7)  |
| C18A | 1.2536(4) | 1.0308(3) | 1.5167(3) | 0.0339(7)  |
| C19A | 1.3568(4) | 0.9808(4) | 1.4267(4) | 0.0384(8)  |
| C20A | 1.3385(4) | 0.8879(4) | 1.3715(3) | 0.0365(7)  |
| C21A | 1.0089(4) | 1.0428(3) | 1.6317(3) | 0.0334(7)  |
| C22A | 1.2814(4) | 1.1286(4) | 1.5773(4) | 0.0422(9)  |
| C23A | 1.4123(5) | 1.0913(6) | 1.6289(5) | 0.0610(13) |
| C24A | 1.4259(6) | 1.2171(7) | 1.6579(5) | 0.0769(19) |
| C25A | 1.3551(6) | 1.3315(7) | 1.5601(6) | 0.079(2)   |
| C26A | 1.2936(5) | 1.2668(5) | 1.4851(4) | 0.0537(11) |

---

**Table 4. Selected bond lengths, (Å)**

---

|           |           |           |          |
|-----------|-----------|-----------|----------|
| F1B-C21B  | 1.340(5)  | F2B-C21B  | 1.349(4) |
| F3B-C21B  | 1.343(4)  | O1B-C8B   | 1.380(4) |
| O1B-C14B  | 1.422(4)  | O2B-C1B   | 1.321(5) |
| O2B-H2BB  | 1.01(6)   | O3B-C1B   | 1.226(5) |
| N1B-C4B   | 1.376(5)  | N1B-C5B   | 1.394(4) |
| N1B-H1BB  | 0.91(4)   | C1B-C2B   | 1.477(6) |
| C2B-C3B   | 1.523(5)  | C3B-C4B   | 1.514(4) |
| C3B-C13B  | 1.575(8)  | C4B-C11B  | 1.348(6) |
| C5B-C6B   | 1.391(5)  | C5B-C10B  | 1.414(5) |
| C6B-C7B   | 1.377(5)  | C7B-C8B   | 1.405(5) |
| C8B-C9B   | 1.384(4)  | C9B-C10B  | 1.408(5) |
| C10B-C11B | 1.430(5)  | C11B-C12B | 1.501(5) |
| C12B-C13B | 1.540(6)  | C14B-C15B | 1.504(5) |
| C15B-C20B | 1.379(5)  | C15B-C16B | 1.393(5) |
| C16B-C17B | 1.393(5)  | C17B-C18B | 1.400(5) |
| C17B-C21B | 1.500(5)  | C18B-C19B | 1.404(5) |
| C18B-C22B | 1.513(5)  | C19B-C20B | 1.384(5) |
| C22B-C23B | 1.510(6)  | C22B-C26B | 1.535(8) |
| C23B-C24B | 1.557(7)  | C25B-C26B | 1.478(9) |
| C25B-C24B | 1.512(12) | F1A-C21A  | 1.344(4) |
| F2A-C21A  | 1.343(4)  | F3A-C21A  | 1.342(4) |
| O1A-C1A   | 1.323(6)  | O1A-H1AB  | 0.94(7)  |
| O2A-C1A   | 1.215(5)  | O3A-C8A   | 1.381(4) |
| O3A-C14A  | 1.428(4)  | N1A-C4A   | 1.374(6) |
| N1A-C5A   | 1.384(5)  | N1A-H1AC  | 0.86(6)  |
| C1A-C2A   | 1.485(7)  | C2A-C3A   | 1.531(5) |
| C3A-C4A   | 1.505(5)  | C3A-C13A  | 1.547(6) |
| C4A-C11A  | 1.354(5)  | C5A-C6A   | 1.397(6) |
| C5A-C10A  | 1.415(6)  | C6A-C7A   | 1.379(6) |
| C7A-C8A   | 1.394(6)  | C8A-C9A   | 1.377(5) |
| C9A-C10A  | 1.407(5)  | C10A-C11A | 1.432(5) |
| C11A-C12A | 1.484(5)  | C12A-C13A | 1.531(5) |
| C14A-C15A | 1.506(4)  | C15A-C16A | 1.386(5) |
| C15A-C20A | 1.392(5)  | C16A-C17A | 1.395(4) |
| C17A-C18A | 1.403(5)  | C17A-C21A | 1.501(4) |
| C18A-C19A | 1.397(5)  | C18A-C22A | 1.517(5) |
| C19A-C20A | 1.386(5)  | C22A-C23A | 1.521(7) |
| C22A-C26A | 1.530(6)  | C23A-C24A | 1.527(7) |
| C24A-C25A | 1.546(10) | C25A-C26A | 1.542(6) |

---

**Table 5. Selected bond angles, (°)**

---

|                |          |                |          |      |
|----------------|----------|----------------|----------|------|
| C8B-O1B-C14B   | 117.3(2) | C1B-O2B-H2BB   | 114(3)   | C4B- |
| N1B-C5B        | 106.7(3) | C4B-N1B-H1BB   | 129(2)   | C5B- |
| N1B-H1BB       | 124(2)   | O3B-C1B-O2B    | 122.4(4) |      |
| O3B-C1B-C2B    | 124.6(4) | O2B-C1B-C2B    | 113.1(3) |      |
| C1B-C2B-C3B    | 117.1(3) | C4B-C3B-C2B    | 116.7(3) |      |
| C4B-C3B-C13B   | 99.2(3)  | C2B-C3B-C13B   | 112.6(4) |      |
| C11B-C4B-N1B   | 111.7(3) | C11B-C4B-C3B   | 113.8(4) |      |
| N1B-C4B-C3B    | 134.3(4) | C6B-C5B-N1B    | 130.2(3) |      |
| C6B-C5B-C10B   | 121.4(3) | N1B-C5B-C10B   | 108.3(3) |      |
| C7B-C6B-C5B    | 118.2(3) | C6B-C7B-C8B    | 121.1(3) |      |
| O1B-C8B-C9B    | 124.3(3) | O1B-C8B-C7B    | 114.1(3) |      |
| C9B-C8B-C7B    | 121.5(3) | C8B-C9B-C10B   | 117.9(3) |      |
| C9B-C10B-C5B   | 119.9(3) | C9B-C10B-C11B  | 133.8(4) |      |
| C5B-C10B-C11B  | 106.3(3) | C4B-C11B-C10B  | 107.0(3) |      |
| C4B-C11B-C12B  | 111.8(3) | C10B-C11B-C12B | 141.1(4) |      |
| C11B-C12B-C13B | 101.8(4) | C12B-C13B-C3B  | 107.9(4) |      |
| O1B-C14B-C15B  | 107.3(3) | C20B-C15B-C16B | 118.6(3) |      |
| C20B-C15B-C14B | 121.2(3) | C16B-C15B-C14B | 120.2(3) |      |
| C17B-C16B-C15B | 120.5(3) | C16B-C17B-C18B | 121.4(3) |      |
| C16B-C17B-C21B | 118.3(3) | C18B-C17B-C21B | 120.3(3) |      |
| C17B-C18B-C19B | 116.9(3) | C17B-C18B-C22B | 124.3(3) |      |
| C19B-C18B-C22B | 118.9(3) | C20B-C19B-C18B | 121.5(3) |      |
| C15B-C20B-C19B | 121.1(3) | F1B-C21B-F3B   | 106.5(3) |      |
| F1B-C21B-F2B   | 105.1(3) | F3B-C21B-F2B   | 106.0(3) |      |
| F1B-C21B-C17B  | 113.2(3) | F3B-C21B-C17B  | 113.0(3) |      |
| F2B-C21B-C17B  | 112.3(3) | C23B-C22B-C18B | 115.3(3) |      |
| C23B-C22B-C26B | 102.1(5) | C18B-C22B-C26B | 115.1(4) |      |
| C22B-C23B-C24B | 101.8(5) | C26B-C25B-C24B | 105.5(6) |      |
| C25B-C26B-C22B | 105.7(6) | C25B-C24B-C23B | 107.2(5) |      |
| C1A-O1A-H1AB   | 107(4)   | C8A-O3A-C14A   | 117.0(3) |      |
| C4A-N1A-C5A    | 107.7(3) | C4A-N1A-H1AC   | 128(4)   | C5A- |
| N1A-H1AC       | 124(4)   | O2A-C1A-O1A    | 121.9(5) |      |
| O2A-C1A-C2A    | 121.8(5) | O1A-C1A-C2A    | 116.3(4) |      |
| C1A-C2A-C3A    | 113.8(3) | C4A-C3A-C2A    | 115.3(3) |      |
| C4A-C3A-C13A   | 100.6(3) | C2A-C3A-C13A   | 111.4(3) |      |
| C11A-C4A-N1A   | 110.5(3) | C11A-C4A-C3A   | 114.3(4) |      |
| N1A-C4A-C3A    | 134.9(4) | N1A-C5A-C6A    | 129.8(4) |      |
| N1A-C5A-C10A   | 108.4(3) | C6A-C5A-C10A   | 121.7(4) |      |
| C7A-C6A-C5A    | 117.6(4) | C6A-C7A-C8A    | 121.4(4) |      |
| C9A-C8A-O3A    | 125.2(3) | C9A-C8A-C7A    | 121.6(3) |      |
| O3A-C8A-C7A    | 113.2(3) | C8A-C9A-C10A   | 118.5(3) |      |
| C9A-C10A-C5A   | 119.1(3) | C9A-C10A-C11A  | 135.1(3) |      |
| C5A-C10A-C11A  | 105.8(3) | C4A-C11A-C10A  | 107.6(3) |      |



|                |          |                |          |
|----------------|----------|----------------|----------|
| C4A-C11A-C12A  | 111.4(3) | C10A-C11A-C12A | 140.9(3) |
| C11A-C12A-C13A | 103.5(3) | C12A-C13A-C3A  | 109.6(3) |
| O3A-C14A-C15A  | 107.3(3) | C16A-C15A-C20A | 118.4(3) |
| C16A-C15A-C14A | 120.1(3) | C20A-C15A-C14A | 121.5(3) |
| C15A-C16A-C17A | 120.5(3) | C16A-C17A-C18A | 121.7(3) |
| C16A-C17A-C21A | 118.2(3) | C18A-C17A-C21A | 120.2(3) |
| C19A-C18A-C17A | 116.6(3) | C19A-C18A-C22A | 119.3(3) |
| C17A-C18A-C22A | 124.1(3) | C20A-C19A-C18A | 121.8(3) |
| C19A-C20A-C15A | 120.8(3) | F3A-C21A-F2A   | 104.9(3) |
| F3A-C21A-F1A   | 106.5(3) | F2A-C21A-F1A   | 106.0(3) |
| F3A-C21A-C17A  | 113.2(3) | F2A-C21A-C17A  | 112.4(3) |
| F1A-C21A-C17A  | 113.2(3) | C18A-C22A-C23A | 115.6(3) |
| C18A-C22A-C26A | 114.9(3) | C23A-C22A-C26A | 102.8(4) |
| C22A-C23A-C24A | 103.4(5) | C23A-C24A-C25A | 105.4(4) |
| C26A-C25A-C24A | 106.3(4) | C22A-C26A-C25A | 103.1(4) |

---

**Table 6. Selected torsion angles, (°)**

---

|                     |           |                     |           |
|---------------------|-----------|---------------------|-----------|
| O3B-C1B-C2B-C3B     | -5.4(5)   | O2B-C1B-C2B-C3B     | 173.8(3)  |
| C1B-C2B-C3B-C4B     | -66.9(5)  | C1B-C2B-C3B-C13B    | 179.4(3)  |
| C5B-N1B-C4B-C11B    | -0.5(4)   | C5B-N1B-C4B-C3B     | 175.4(4)  |
| C2B-C3B-C4B-C11B    | -136.0(4) | C13B-C3B-C4B-C11B   | -14.8(4)  |
| C2B-C3B-C4B-N1B     | 48.2(6)   | C13B-C3B-C4B-N1B    | 169.3(4)  |
| C4B-N1B-C5B-C6B     | 178.0(4)  | C4B-N1B-C5B-C10B    | -0.2(4)   |
| N1B-C5B-C6B-C7B     | -178.5(4) | C10B-C5B-C6B-C7B    | -0.5(5)   |
| C5B-C6B-C7B-C8B     | -1.0(6)   | C14B-O1B-C8B-C9B    | -0.9(5)   |
| C14B-O1B-C8B-C7B    | 177.8(3)  | C6B-C7B-C8B-O1B     | -177.1(3) |
| C6B-C7B-C8B-C9B     | 1.6(5)    | O1B-C8B-C9B-C10B    | 178.0(3)  |
| C7B-C8B-C9B-C10B    | -0.6(5)   | C8B-C9B-C10B-C5B    | -0.9(5)   |
| C8B-C9B-C10B-C11B   | 177.9(4)  | C6B-C5B-C10B-C9B    | 1.5(5)    |
| N1B-C5B-C10B-C9B    | 179.9(3)  | C6B-C5B-C10B-C11B   | -177.6(3) |
| N1B-C5B-C10B-C11B   | 0.8(4)    | N1B-C4B-C11B-C10B   | 1.0(4)    |
| C3B-C4B-C11B-C10B   | -175.8(3) | N1B-C4B-C11B-C12B   | 178.2(3)  |
| C3B-C4B-C11B-C12B   | 1.4(5)    | C9B-C10B-C11B-C4B   | -180.0(4) |
| C5B-C10B-C11B-C4B   | -1.1(4)   | C9B-C10B-C11B-C12B  | 4.1(8)    |
| C5B-C10B-C11B-C12B  | -177.0(5) | C4B-C11B-C12B-C13B  | 13.1(5)   |
| C10B-C11B-C12B-C13B | -171.1(5) | C11B-C12B-C13B-C3B  | -22.1(5)  |
| C4B-C3B-C13B-C12B   | 22.3(4)   | C2B-C3B-C13B-C12B   | 146.4(4)  |
| C8B-O1B-C14B-C15B   | -174.6(3) | O1B-C14B-C15B-C20B  | 102.8(4)  |
| O1B-C14B-C15B-C16B  | -76.3(4)  | C20B-C15B-C16B-C17B | -0.2(5)   |
| C14B-C15B-C16B-C17B | 178.9(3)  | C15B-C16B-C17B-C18B | 2.8(5)    |
| C15B-C16B-C17B-C21B | -177.1(3) | C16B-C17B-C18B-C19B | -3.3(5)   |
| C21B-C17B-C18B-C19B | 176.5(3)  | C16B-C17B-C18B-C22B | 175.6(3)  |
| C21B-C17B-C18B-C22B | -4.6(5)   | C17B-C18B-C19B-C20B | 1.5(6)    |
| C22B-C18B-C19B-C20B | -177.5(4) | C16B-C15B-C20B-C19B | -1.7(5)   |
| C14B-C15B-C20B-C19B | 179.2(3)  | C18B-C19B-C20B-C15B | 1.0(6)    |
| C16B-C17B-C21B-F1B  | 9.1(5)    | C18B-C17B-C21B-F1B  | -170.8(3) |
| C16B-C17B-C21B-F3B  | -112.1(4) | C18B-C17B-C21B-F3B  | 68.0(4)   |
| C16B-C17B-C21B-F2B  | 128.0(4)  | C18B-C17B-C21B-F2B  | -51.8(5)  |
| C17B-C18B-C22B-C23B | 112.1(5)  | C19B-C18B-C22B-C23B | -69.0(6)  |
| C17B-C18B-C22B-C26B | -129.3(5) | C19B-C18B-C22B-C26B | 49.6(6)   |
| C18B-C22B-C23B-C24B | 164.9(5)  | C26B-C22B-C23B-C24B | 39.3(5)   |
| C24B-C25B-C26B-C22B | 24.6(8)   | C23B-C22B-C26B-C25B | -41.0(6)  |
| C18B-C22B-C26B-C25B | -166.7(5) | C26B-C25B-C24B-C23B | 0.5(8)    |
| C22B-C23B-C24B-C25B | -25.4(7)  | O2A-C1A-C2A-C3A     | 101.1(5)  |
| O1A-C1A-C2A-C3A     | -78.6(4)  | C1A-C2A-C3A-C4A     | -60.1(5)  |
| C1A-C2A-C3A-C13A    | -173.8(4) | C5A-N1A-C4A-C11A    | -0.3(6)   |
| C5A-N1A-C4A-C3A     | 172.8(5)  | C2A-C3A-C4A-C11A    | -126.3(4) |
| C13A-C3A-C4A-C11A   | -6.4(4)   | C2A-C3A-C4A-N1A     | 60.8(7)   |
| C13A-C3A-C4A-N1A    | -179.3(5) | C4A-N1A-C5A-C6A     | -177.1(6) |
| C4A-N1A-C5A-C10A    | 0.3(6)    | N1A-C5A-C6A-C7A     | 176.1(6)  |

|                     |           |                     |           |
|---------------------|-----------|---------------------|-----------|
| C10A-C5A-C6A-C7A    | -1.1(9)   | C5A-C6A-C7A-C8A     | 2.1(9)    |
| C14A-O3A-C8A-C9A    | -3.4(5)   | C14A-O3A-C8A-C7A    | 177.5(3)  |
| C6A-C7A-C8A-C9A     | -0.7(8)   | C6A-C7A-C8A-O3A     | 178.4(5)  |
| O3A-C8A-C9A-C10A    | 179.4(3)  | C7A-C8A-C9A-C10A    | -1.6(5)   |
| C8A-C9A-C10A-C5A    | 2.5(5)    | C8A-C9A-C10A-C11A   | -175.7(3) |
| N1A-C5A-C10A-C9A    | -178.9(4) | C6A-C5A-C10A-C9A    | -1.2(7)   |
| N1A-C5A-C10A-C11A   | -0.2(5)   | C6A-C5A-C10A-C11A   | 177.5(5)  |
| N1A-C4A-C11A-C10A   | 0.2(5)    | C3A-C4A-C11A-C10A   | -174.5(3) |
| N1A-C4A-C11A-C12A   | 177.2(4)  | C3A-C4A-C11A-C12A   | 2.6(5)    |
| C9A-C10A-C11A-C4A   | 178.4(4)  | C5A-C10A-C11A-C4A   | 0.0(4)    |
| C9A-C10A-C11A-C12A  | 2.7(8)    | C5A-C10A-C11A-C12A  | -175.6(5) |
| C4A-C11A-C12A-C13A  | 2.7(5)    | C10A-C11A-C12A-C13A | 178.2(4)  |
| C11A-C12A-C13A-C3A  | -6.7(5)   | C4A-C3A-C13A-C12A   | 7.8(5)    |
| C2A-C3A-C13A-C12A   | 130.5(4)  | C8A-O3A-C14A-C15A   | -175.8(3) |
| O3A-C14A-C15A-C16A  | 78.2(4)   | O3A-C14A-C15A-C20A  | -100.1(4) |
| C20A-C15A-C16A-C17A | -2.3(5)   | C14A-C15A-C16A-C17A | 179.4(3)  |
| C15A-C16A-C17A-C18A | -1.9(5)   | C15A-C16A-C17A-C21A | 177.7(3)  |
| C16A-C17A-C18A-C19A | 4.4(5)    | C21A-C17A-C18A-C19A | -175.3(3) |
| C16A-C17A-C18A-C22A | -176.2(3) | C21A-C17A-C18A-C22A | 4.1(5)    |
| C17A-C18A-C19A-C20A | -2.7(6)   | C22A-C18A-C19A-C20A | 177.8(4)  |
| C18A-C19A-C20A-C15A | -1.4(6)   | C16A-C15A-C20A-C19A | 4.0(5)    |
| C14A-C15A-C20A-C19A | -177.7(3) | C16A-C17A-C21A-F3A  | -10.0(4)  |
| C18A-C17A-C21A-F3A  | 169.7(3)  | C16A-C17A-C21A-F2A  | -128.5(3) |
| C18A-C17A-C21A-F2A  | 51.1(4)   | C16A-C17A-C21A-F1A  | 111.4(3)  |
| C18A-C17A-C21A-F1A  | -68.9(4)  | C19A-C18A-C22A-C23A | -47.3(5)  |
| C17A-C18A-C22A-C23A | 133.3(4)  | C19A-C18A-C22A-C26A | 72.3(5)   |
| C17A-C18A-C22A-C26A | -107.1(4) | C18A-C22A-C23A-C24A | 169.3(3)  |
| C26A-C22A-C23A-C24A | 43.3(4)   | C22A-C23A-C24A-C25A | -29.1(5)  |
| C23A-C24A-C25A-C26A | 4.2(5)    | C18A-C22A-C26A-C25A | -166.7(4) |
| C23A-C22A-C26A-C25A | -40.3(4)  | C24A-C25A-C26A-C22A | 22.1(5)   |

---

**Table 7. Anisotropic atomic displacement parameters, ( $\text{\AA}^2$ )**

The anisotropic atomic displacement factor exponent takes the form:  $-2\pi^2 [ h^2a^*{}^2 U_{11} + \dots + 2hka^* b^* U_{12} ]$

|      | $U_{11}$   | $U_{22}$   | $U_{33}$   | $U_{23}$    | $U_{13}$    | $U_{12}$    |
|------|------------|------------|------------|-------------|-------------|-------------|
| F1B  | 0.0527(13) | 0.0456(13) | 0.0619(15) | -0.0276(11) | 0.0100(11)  | -0.0068(10) |
| F2B  | 0.0763(16) | 0.0262(10) | 0.0430(11) | -0.0134(9)  | 0.0040(11)  | -0.0029(10) |
| F3B  | 0.0898(19) | 0.0456(13) | 0.0277(10) | -0.0161(9)  | 0.0059(11)  | -0.0116(12) |
| O1B  | 0.0423(12) | 0.0247(11) | 0.0415(12) | -0.0164(9)  | -0.0162(10) | 0.0001(9)   |
| O2B  | 0.0567(16) | 0.074(2)   | 0.0366(13) | -0.0243(13) | 0.0045(12)  | -0.0401(15) |
| O3B  | 0.0484(15) | 0.0438(15) | 0.0666(18) | -0.0343(14) | 0.0153(13)  | -0.0236(12) |
| N1B  | 0.0426(16) | 0.0372(16) | 0.0447(17) | -0.0244(13) | -0.0066(13) | -0.0070(13) |
| C1B  | 0.0412(19) | 0.044(2)   | 0.052(2)   | -0.0360(18) | 0.0115(16)  | -0.0181(16) |
| C2B  | 0.0416(19) | 0.0427(19) | 0.060(2)   | -0.0305(18) | 0.0022(16)  | -0.0139(16) |
| C3B  | 0.0352(18) | 0.0378(19) | 0.088(3)   | -0.040(2)   | -0.0012(19) | -0.0053(15) |
| C4B  | 0.0323(16) | 0.0325(17) | 0.060(2)   | -0.0286(16) | -0.0002(15) | -0.0053(13) |
| C5B  | 0.0343(16) | 0.0312(17) | 0.0405(18) | -0.0191(14) | -0.0037(14) | -0.0055(13) |
| C6B  | 0.048(2)   | 0.0292(17) | 0.047(2)   | -0.0137(15) | -0.0190(16) | -0.0009(15) |
| C7B  | 0.0452(19) | 0.0243(15) | 0.0458(19) | -0.0152(14) | -0.0171(15) | -0.0003(14) |
| C8B  | 0.0334(16) | 0.0270(16) | 0.0365(17) | -0.0156(13) | -0.0058(13) | -0.0047(12) |
| C9B  | 0.0305(16) | 0.0265(16) | 0.0377(17) | -0.0135(13) | -0.0061(13) | -0.0035(12) |
| C10B | 0.0295(15) | 0.0288(16) | 0.0444(18) | -0.0169(14) | -0.0056(13) | -0.0025(12) |
| C11B | 0.0330(16) | 0.0288(17) | 0.058(2)   | -0.0211(15) | -0.0058(15) | -0.0022(13) |
| C12B | 0.045(2)   | 0.0266(18) | 0.091(3)   | -0.0239(19) | -0.023(2)   | 0.0028(15)  |
| C13B | 0.060(3)   | 0.031(2)   | 0.128(5)   | -0.037(3)   | -0.041(3)   | 0.0089(18)  |
| C14B | 0.0406(17) | 0.0272(15) | 0.0370(17) | -0.0124(13) | -0.0115(14) | 0.0010(13)  |

|      |            |            |            |             |             |             |
|------|------------|------------|------------|-------------|-------------|-------------|
| C15B | 0.0392(17) | 0.0264(15) | 0.0306(16) | -0.0097(12) | -0.0105(13) | 0.0011(13)  |
| C16B | 0.0400(17) | 0.0294(16) | 0.0286(15) | -0.0088(12) | -0.0061(13) | -0.0040(13) |
| C17B | 0.0474(19) | 0.0283(15) | 0.0230(14) | -0.0074(12) | -0.0060(13) | -0.0043(14) |
| C18B | 0.054(2)   | 0.0374(18) | 0.0268(15) | -0.0118(13) | -0.0088(14) | -0.0112(16) |
| C19B | 0.0426(19) | 0.052(2)   | 0.0358(17) | -0.0201(16) | -0.0056(14) | -0.0136(16) |
| C20B | 0.0386(17) | 0.045(2)   | 0.0323(16) | -0.0202(15) | -0.0035(13) | -0.0056(15) |
| C21B | 0.059(2)   | 0.0302(17) | 0.0318(17) | -0.0124(14) | -0.0001(16) | -0.0081(16) |
| C22B | 0.071(3)   | 0.049(2)   | 0.0340(18) | -0.0206(16) | -0.0061(18) | -0.021(2)   |
| C23B | 0.109(4)   | 0.065(3)   | 0.050(2)   | -0.029(2)   | 0.009(3)    | -0.051(3)   |
| C25B | 0.141(7)   | 0.149(8)   | 0.103(6)   | -0.068(6)   | -0.033(5)   | -0.060(6)   |
| C26B | 0.096(4)   | 0.101(5)   | 0.086(4)   | -0.058(4)   | -0.040(3)   | -0.014(3)   |
| C24B | 0.135(6)   | 0.111(5)   | 0.096(5)   | -0.071(4)   | 0.014(4)    | -0.081(5)   |
| F1A  | 0.0614(13) | 0.0406(12) | 0.0256(9)  | -0.0115(8)  | 0.0019(9)   | -0.0097(10) |
| F2A  | 0.0535(12) | 0.0291(10) | 0.0405(10) | -0.0159(8)  | 0.0014(9)   | -0.0047(9)  |
| F3A  | 0.0411(11) | 0.0496(13) | 0.0561(13) | -0.0320(11) | 0.0035(10)  | -0.0117(10) |
| O1A  | 0.0627(19) | 0.0423(16) | 0.0624(19) | -0.0151(14) | 0.0215(15)  | -0.0163(14) |
| O2A  | 0.108(3)   | 0.079(2)   | 0.0381(15) | -0.0139(15) | -0.0035(16) | -0.066(2)   |
| O3A  | 0.0475(14) | 0.0270(11) | 0.0371(12) | -0.0155(9)  | -0.0116(10) | -0.0055(10) |
| N1A  | 0.084(3)   | 0.0402(19) | 0.104(3)   | -0.045(2)   | -0.067(3)   | 0.0221(18)  |
| C1A  | 0.074(3)   | 0.040(2)   | 0.047(2)   | -0.0337(18) | 0.020(2)    | -0.026(2)   |
| C2A  | 0.073(3)   | 0.0322(18) | 0.060(2)   | -0.0270(18) | 0.014(2)    | -0.0092(18) |
| C3A  | 0.0416(18) | 0.0407(19) | 0.057(2)   | -0.0317(17) | -0.0023(16) | -0.0110(15) |
| C4A  | 0.044(2)   | 0.0370(19) | 0.072(3)   | -0.0341(19) | -0.0198(19) | 0.0046(15)  |
| C5A  | 0.067(3)   | 0.036(2)   | 0.078(3)   | -0.035(2)   | -0.042(2)   | 0.0102(18)  |
| C6A  | 0.108(4)   | 0.041(2)   | 0.108(4)   | -0.044(3)   | -0.080(4)   | 0.027(2)    |
| C7A  | 0.082(3)   | 0.0283(19) | 0.078(3)   | -0.028(2)   | -0.046(3)   | 0.0133(19)  |
| C8A  | 0.0382(17) | 0.0290(16) | 0.0392(17) | -0.0196(14) | -0.0071(14) | -0.0058(13) |
| C9A  | 0.0318(15) | 0.0279(15) | 0.0290(15) | -0.0116(12) | -0.0029(12) | -0.0039(12) |

|      |            |            |            |             |             |             |
|------|------------|------------|------------|-------------|-------------|-------------|
| C10A | 0.0331(16) | 0.0285(17) | 0.0371(16) | -0.0173(13) | -0.0036(13) | -0.0010(13) |
| C11A | 0.0334(16) | 0.0321(17) | 0.0395(17) | -0.0205(14) | -0.0029(13) | -0.0057(13) |
| C12A | 0.100(4)   | 0.0271(17) | 0.0384(19) | -0.0083(14) | -0.021(2)   | -0.020(2)   |
| C13A | 0.059(2)   | 0.0309(19) | 0.082(3)   | -0.028(2)   | -0.023(2)   | -0.0025(17) |
| C14A | 0.0407(17) | 0.0317(16) | 0.0339(16) | -0.0178(13) | -0.0060(13) | -0.0050(14) |
| C15A | 0.0428(18) | 0.0291(16) | 0.0308(16) | -0.0133(13) | -0.0071(14) | -0.0061(14) |
| C16A | 0.0375(16) | 0.0273(15) | 0.0280(14) | -0.0089(12) | -0.0048(12) | -0.0077(13) |
| C17A | 0.0391(17) | 0.0264(15) | 0.0253(14) | -0.0095(12) | -0.0029(12) | -0.0060(13) |
| C18A | 0.0449(18) | 0.0325(17) | 0.0273(15) | -0.0125(13) | -0.0018(13) | -0.0120(14) |
| C19A | 0.0417(19) | 0.0448(19) | 0.0354(17) | -0.0204(15) | 0.0001(14)  | -0.0152(15) |
| C20A | 0.0393(17) | 0.0411(19) | 0.0329(16) | -0.0188(14) | 0.0003(13)  | -0.0100(15) |
| C21A | 0.0406(18) | 0.0287(16) | 0.0311(16) | -0.0108(13) | -0.0010(14) | -0.0086(14) |
| C22A | 0.050(2)   | 0.049(2)   | 0.0364(18) | -0.0258(16) | 0.0063(16)  | -0.0222(17) |
| C23A | 0.057(3)   | 0.090(4)   | 0.058(3)   | -0.048(3)   | -0.003(2)   | -0.028(2)   |
| C24A | 0.078(3)   | 0.127(5)   | 0.056(3)   | -0.061(3)   | 0.021(3)    | -0.063(4)   |
| C25A | 0.091(4)   | 0.091(4)   | 0.080(4)   | -0.061(3)   | 0.029(3)    | -0.064(3)   |
| C26A | 0.072(3)   | 0.051(2)   | 0.046(2)   | -0.0292(19) | 0.016(2)    | -0.034(2)   |

---

**Table 8. Hydrogen atom coordinates and isotropic atomic displacement parameters, ( $\text{\AA}^2$ )**

|      | x/a      | y/b      | z/c      | U        |
|------|----------|----------|----------|----------|
| H2BB | 0.974(6) | 0.469(6) | 0.617(6) | 0.077    |
| H1BB | 0.766(4) | 0.240(4) | 0.492(4) | 0.029(9) |
| H2BC | 0.8568   | 0.5600   | 0.3307   | 0.055    |
| H2BD | 0.7553   | 0.6615   | 0.4029   | 0.055    |
| H3BA | 0.5793   | 0.5329   | 0.4487   | 0.060    |
| H6BA | 0.8034   | -0.0041  | 0.4417   | 0.048    |
| H7BA | 0.7571   | -0.1076  | 0.3032   | 0.044    |
| H9BA | 0.5752   | 0.2410   | 0.0964   | 0.037    |
| H12C | 0.4676   | 0.5350   | 0.2050   | 0.063    |
| H12D | 0.5992   | 0.5465   | 0.0880   | 0.063    |
| H13C | 0.5475   | 0.6884   | 0.2574   | 0.081    |
| H13D | 0.6991   | 0.6506   | 0.1819   | 0.081    |
| H14C | 0.6131   | 0.1100   | -0.0515  | 0.041    |
| H14D | 0.4735   | 0.0978   | 0.0540   | 0.041    |
| H16B | 0.7227   | -0.0896  | -0.1396  | 0.039    |
| H19B | 0.2935   | -0.2150  | -0.0221  | 0.049    |
| H20B | 0.3366   | -0.0579  | 0.0602   | 0.045    |
| H22B | 0.5254   | -0.3706  | -0.2542  | 0.058    |
| H23C | 0.3541   | -0.4629  | -0.0059  | 0.084    |
| H23D | 0.4997   | -0.5367  | -0.0638  | 0.084    |
| H25C | 0.3247   | -0.4306  | -0.3513  | 0.138    |
| H25D | 0.1860   | -0.4179  | -0.2457  | 0.138    |

|      |          |          |          |           |
|------|----------|----------|----------|-----------|
| H26C | 0.2444   | -0.2625  | -0.1869  | 0.099     |
| H26D | 0.3383   | -0.2364  | -0.3308  | 0.099     |
| H24C | 0.4136   | -0.5978  | -0.2062  | 0.121     |
| H24D | 0.2746   | -0.5860  | -0.1012  | 0.121     |
| H1AB | 0.822(7) | 0.330(7) | 0.763(7) | 0.091     |
| H1AC | 0.921(6) | 0.529(5) | 0.935(6) | 0.065(15) |
| H2AC | 1.1436   | 0.2133   | 0.9078   | 0.068     |
| H2AD | 1.0336   | 0.1159   | 0.9498   | 0.068     |
| H3AB | 0.8992   | 0.2282   | 1.1033   | 0.051     |
| H6AB | 0.9181   | 0.7782   | 0.9555   | 0.090     |
| H7AB | 0.9885   | 0.8844   | 1.0781   | 0.069     |
| H9AB | 1.1731   | 0.5376   | 1.2807   | 0.035     |
| H12E | 1.0841   | 0.2312   | 1.3241   | 0.063     |
| H12F | 1.2269   | 0.2324   | 1.2217   | 0.063     |
| H13E | 1.0321   | 0.0924   | 1.2366   | 0.064     |
| H13F | 1.1655   | 0.1085   | 1.1238   | 0.064     |
| H14E | 1.2854   | 0.6871   | 1.3168   | 0.040     |
| H14F | 1.1448   | 0.6688   | 1.4198   | 0.040     |
| H16C | 1.0254   | 0.8606   | 1.5139   | 0.037     |
| H19C | 1.4418   | 1.0113   | 1.4027   | 0.046     |
| H20C | 1.4102   | 0.8576   | 1.3091   | 0.044     |
| H22C | 1.2047   | 1.1375   | 1.6521   | 0.051     |
| H23E | 1.4903   | 1.0666   | 1.5627   | 0.073     |
| H23F | 1.4059   | 1.0168   | 1.7092   | 0.073     |
| H24E | 1.5225   | 1.2252   | 1.6450   | 0.092     |
| H24F | 1.3812   | 1.2169   | 1.7489   | 0.092     |
| H25E | 1.2831   | 1.3870   | 1.6070   | 0.095     |
| H25F | 1.4213   | 1.3877   | 1.4991   | 0.095     |



|      |        |        |        |       |
|------|--------|--------|--------|-------|
| H26E | 1.2037 | 1.3159 | 1.4692 | 0.064 |
| H26F | 1.3540 | 1.2623 | 1.4004 | 0.064 |

---

**Table 9. Selected hydrogen bond information , (Å and °).**

| D-H...A        | d(D-H)  | d(H...A) | d(D...A) | <(DHA) |
|----------------|---------|----------|----------|--------|
| N1B-H1BB...O3B | 0.91(4) | 2.54(4)  | 3.096(4) | 120(3) |
| O1A-H1AB...O3B | 0.94(7) | 1.79(7)  | 2.703(5) | 166(6) |
| O2B-H2BB...O2A | 1.01(6) | 1.59(6)  | 2.600(5) | 175(6) |

---

### ***In Vitro / In Vivo Pharmacology Materials and Methods***

Animals: Rats and mice were used in the in vivo pharmacology assays. All animal studies were performed according to the Guide for the Care and Use of Laboratory Animals published by the National Academy of Sciences (1996). All study protocols were reviewed and approved by Arena Pharmaceuticals Institutional Animal Care and Use Committee (IACUC). Animals were housed in standard cages and were maintained at 25±1°C under 12 hour light and dark cycles. Water and standard diet was provided *ad libitum*.

Chemicals: APD334, (R)-2-(7-(4-cyclopentyl-3-(trifluoromethyl)benzyloxy)-1,2,3,4-tetrahydrocyclopenta[b]indol-3-yl)acetic acid, was synthesized at Arena Pharmaceuticals. APD334 was suspended in 0.5% methyl cellulose (MC). MTX was purchased from Sigma, St. Louis, MO. Gilenya® was purchased from Cayman, Ann Arbor, MI. and was used to synthesize Gilenya®-P. Bovine type II collagen was purchased from Elastin Products, Owensville, MO. Freund's complete adjuvant was purchased from

Difco, Detroit, MI for CIA experiments and from Chondrex, Redmond, WA, for EAE experiments. MOG<sub>35-55</sub> peptide was purchased from NeoMPS, San Diego, CA.

**Agonist HTRF cAMP Assay:** HTRF cAMP assays were performed according to the manufacturer's instructions (Cisbio, cAMP Dynamic 2 Assay Kit 62AM4PEJ). HEK 293 cells stably expressing either recombinant human, mouse, rat, dog or monkey S1P<sub>1</sub> receptor were harvested with trypsin/EDTA, quenched with Trypsin Inhibitor-Soybean Protein (Invitrogen 17075) and suspended in PBS supplemented with 0.05% fatty acid free BSA (Sigma A8806). 5 µL of this suspension was plated into PE Proxiplate 384-Plus (Perkin Elmer 6008280) plates. Cell number per well was receptor dependent but averaged approximately 1500. Compounds were suspended and serially diluted in DMSO using 5-fold dilutions to generate a 10-point dose-response curve with a top concentration of 10 µM. Serially diluted compounds were uniformly diluted further in PBS-based assay buffer containing 10 µM forskolin (F6886), 1 mM IBMX (Sigma I5879) supplemented with 0.05% fatty acid free BSA (Sigma A8806) to achieve a 2X stock. Five µL per well of compound solution was transferred to the assay plates in triplicate along with a cAMP standard curve. After 1 hour at room temperature, 5 µL of cAMP-D2 reagent diluted in Lysis Buffer was added followed by 5 µL of Cryptate reagent (all supplied with kit). Plates were then incubated at room temperature for 1 hour prior to reading. Time-resolved fluorescence measurements were collected on PerkinElmer Envision or BMG Pherastar microplate readers. Dose response curves were generated using a nonlinear least squares curve fitting program to obtain EC<sub>50</sub> values.

**Mouse and Rat Lymphopenia:** APD334 induced effects on blood lymphopenia were determined in male BALB/c mice and male Sprague-Dawley rats. Briefly, male rats and mice were given a 0 (vehicle only), 0.03 (mice only), 0.1, 0.3 or 1 mg/kg oral dose of APD334 formulated in 0.5% methylcellulose (MC) in water. Mouse blood samples were taken at 0, 1, 3, 5, 8, 16, 24 and 32 hours post-dose. Rat blood samples were collected at 0, 1, 3, 5, 8, 16, 24, 32, 48 and 72 hours post-dose. Blood lymphocyte levels were determined using an Abbott Cell-Dyn 3700 instrument (Abbott Diagnostics, IL).

**Experimental Autoimmune Encephalomyelitis:** Female C57BL/6 mice (8-10 week old) were procured from Charles River Laboratories. Mice were immunized subcutaneously with a total of 100 mg MOG<sub>35-55</sub> peptide (NeoMPS, San Diego, CA) emulsified 1:1 with Freund's complete adjuvant containing 4 mg/ml

heat-killed *Mycobacterium tuberculosis*. Mice received 200 ng pertussis toxin intraperitoneally on day of immunization and again 48 hours later. Mice were monitored daily from day 7 for disease symptoms. The following disease scoring scale was used: 0 = Healthy; 1 = limp tail or hind limb weakness; 2 = limp tail and limb weakness or weakness of 2 or more limbs; 3 = severe limb weakness or single limb paralysis; 4 = paralysis of 2 or more limbs; 5 = death. In the prophylactic dosing study, mice were dosed orally, once daily from days 3-25; and in the therapeutic dosing study from days 18-37. Compounds were suspended in 0.5% MC vehicle using a sonicator to ensure uniform suspension. Dosing volume was 5 ml/kg. APD334 was dosed at 0.3, 1 and 3 mg/kg and Gilenya® at 1 mg/kg dose. 12 mice were used per group. On day 37, spinal cord and brain integrity was assessed by immunohistochemistry staining of 6 mM thick acetone-fixed frozen spinal cord sections. Infiltrating T cells were identified by direct immunohistochemistry using PE-conjugated anti-CD3 mAb and FITC-conjugated anti-CD4 mAb (BD Pharmingen, San Jose, CA). Nuclei were stained with DAPI and slides were mounted with Vectashield hard set mounting medium (Vector Laboratories, Burlingame, CA).

Data analysis. Statistical analysis was performed on the data from the EAE disease model using one-way analysis of variance (ANOVA) test followed by Dunnett's multiple comparison post-test. Histopathology parameters were evaluated using a Student's t-test with significance set at 5%.

APD334  $^1\text{H}$  NMR ( $\text{DMSO}-d_6$ ):

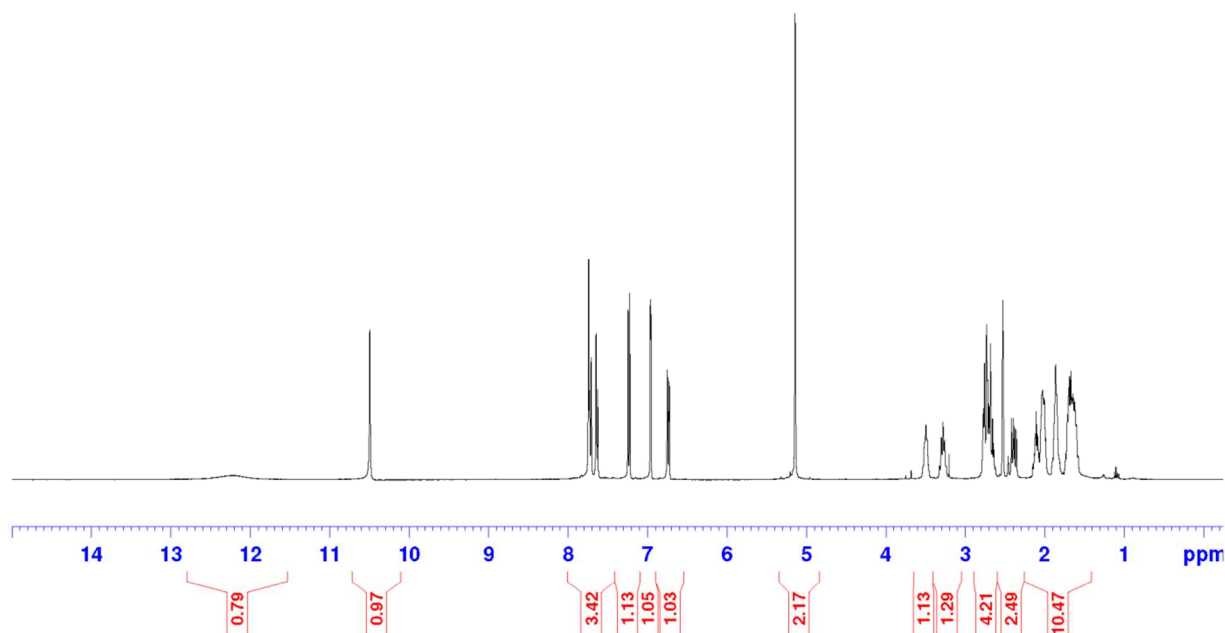

APD334  $^{13}\text{C}$  NMR APT (DMSO- $d_6$ ):

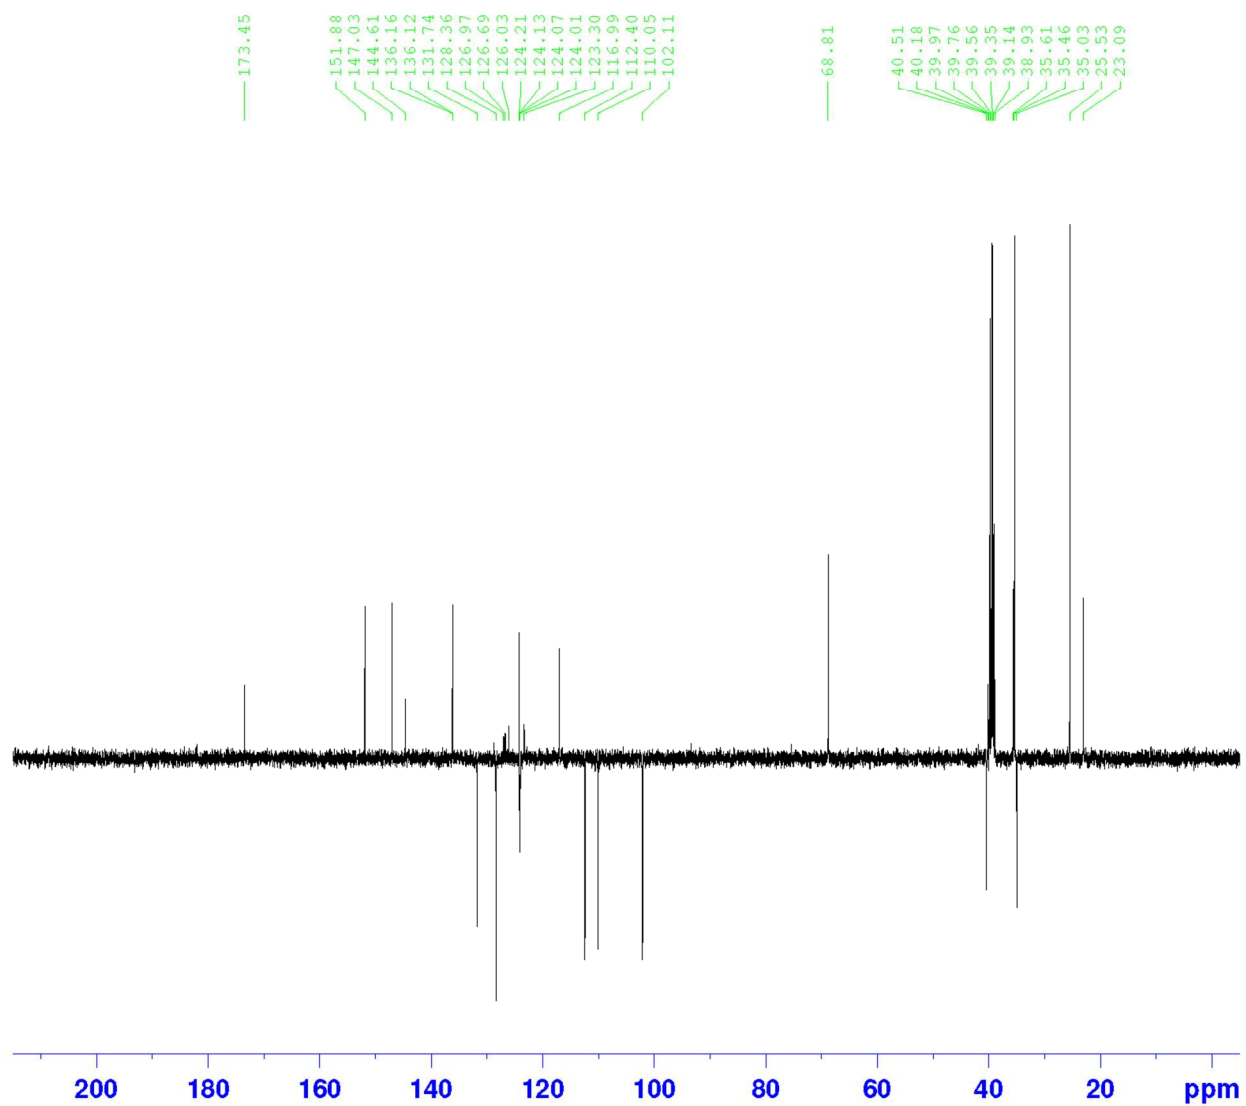

APD334 <sup>13</sup>C (DMSO-d<sub>6</sub>):

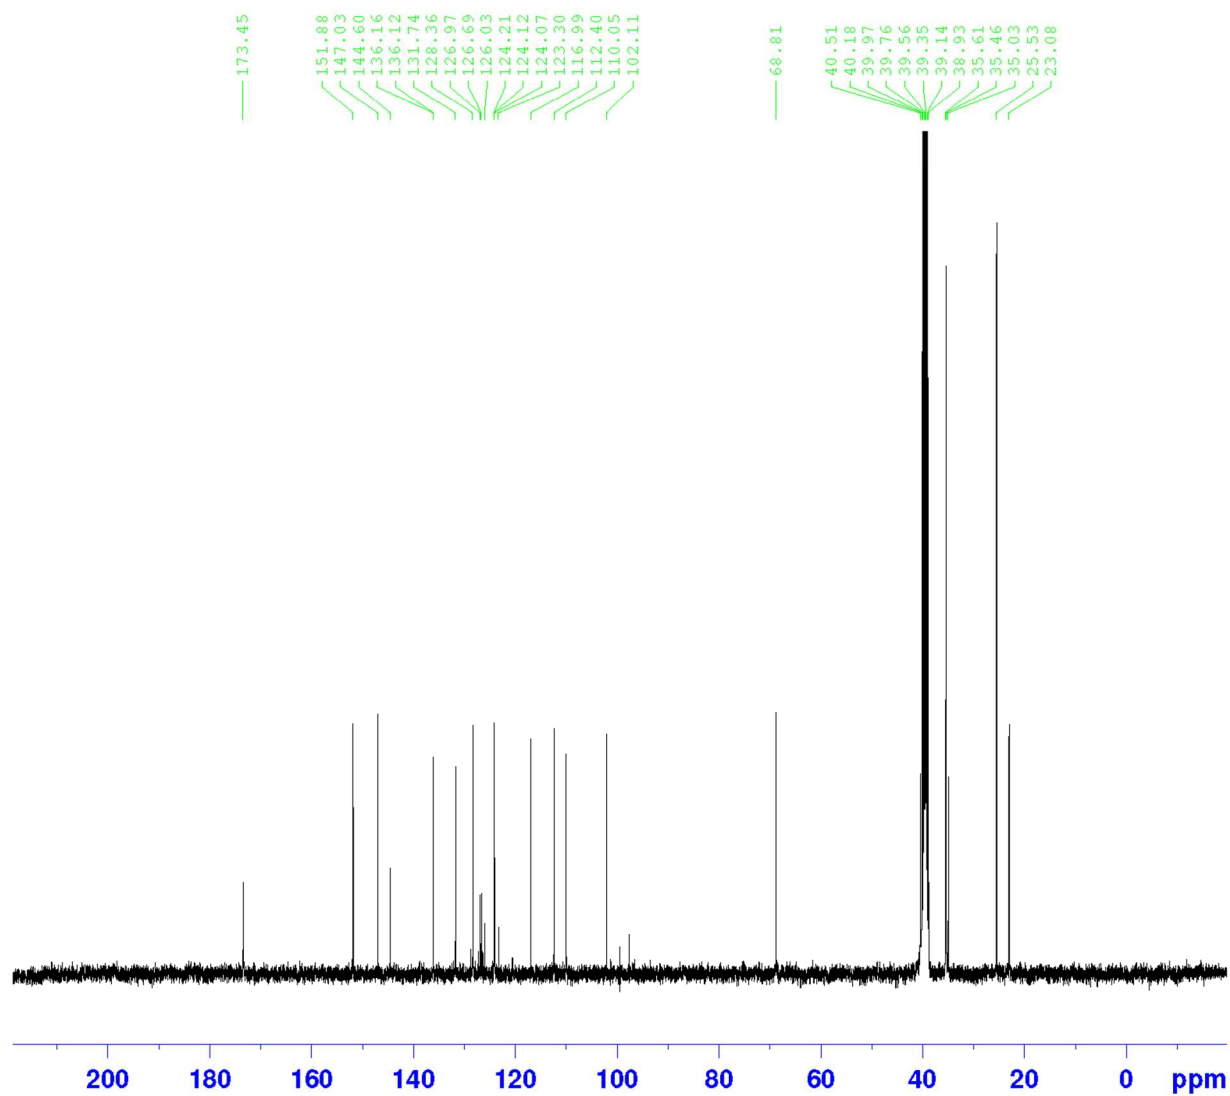

APD334  $^{19}\text{F}$  NMR (DMSO- $d_6$ ):

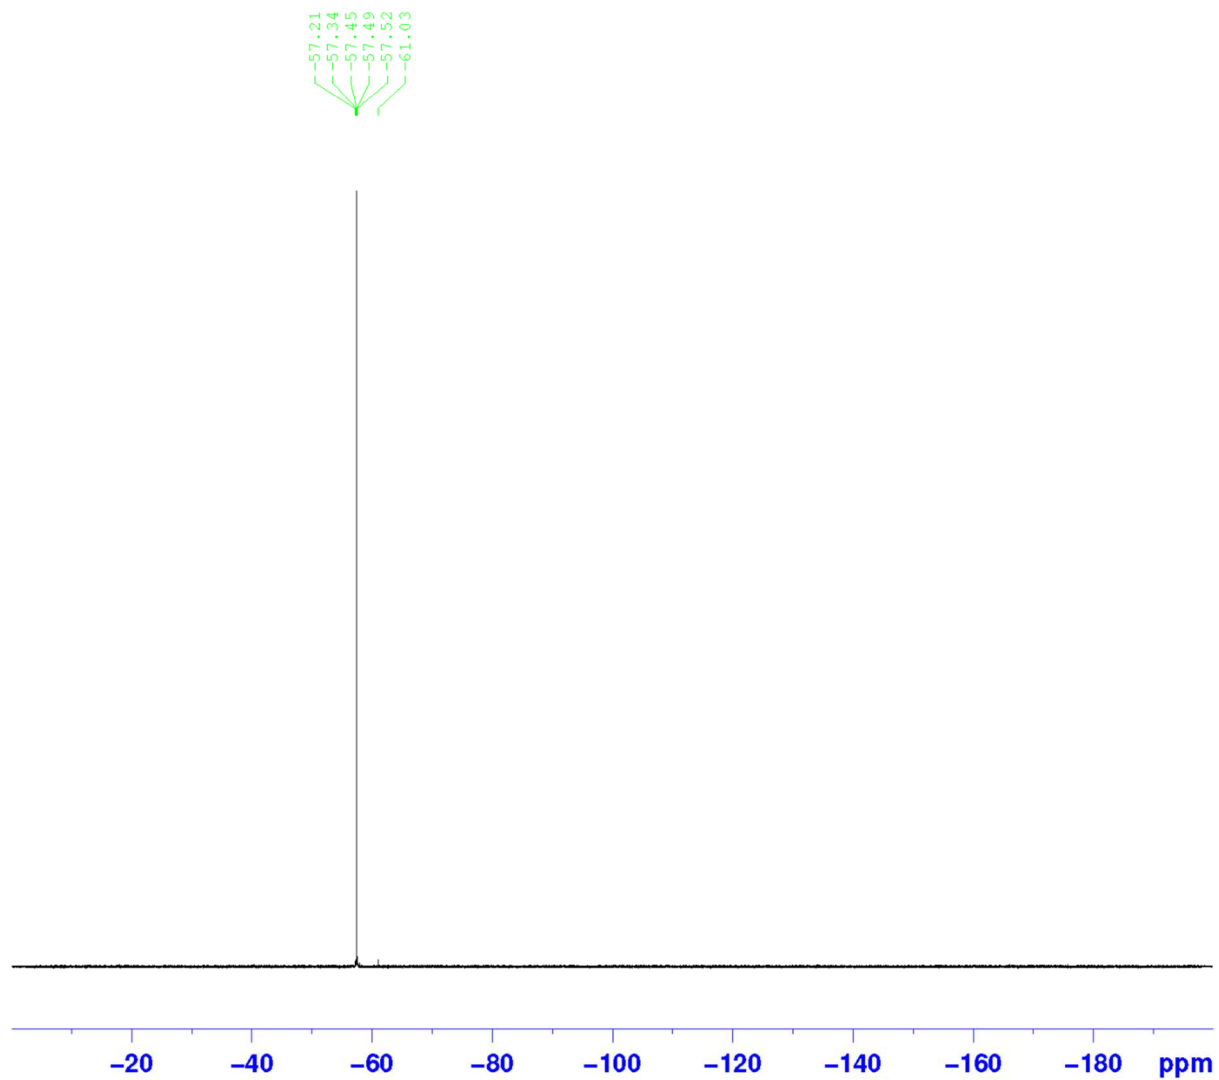

Supplement: ml500389m_si_001.pdf [file ml500389m_si_001.pdf]
